# Supplementary material for: Inhibition of twisting of a green fluorescent protein-like chromophore by metal complexation
Source: Royal Society of Chemistry journal article supplement (doi:10.1039/b927313a), 2010-01-01
Supplement: b927313a.pdf [file b927313a.pdf]

## Inhibition of Twisting of a Green Fluorescent Protein-like Chromophore by Metal Complexation

Anthony Baldrige, Kyril M. Solntsev,\* Charles Song, Tatsuro Tanioka, Janusz Kowalik,\*  
Kenneth Hardcastle, and Laren M. Tolbert\*

### SUPPORTING INFORMATION

#### 1. Synthesis and characterization of PyMDI.

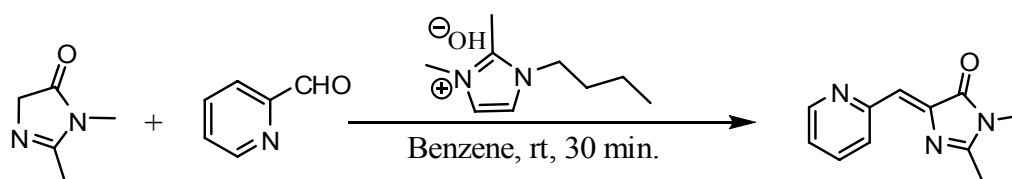

The title compound (**PyMDI**) was conveniently obtained in a 76% yield via a Knoevenagel-type condensation of 2-pyridinecarbaldehyde with 1,2-dimethyl-1*H*-imidazol-5(4*H*)-one.

<sup>1</sup> The reaction was catalyzed using 3-butyl-1,2-dimethyl-1*H*-imidazol-3-ium hydroxide, a recently developed ionic liquid with literature precedence for use with aldol condensation reactions<sup>2</sup>, Michael additions<sup>3</sup> and Knoevenagel condensations.<sup>4</sup> It is critical that the reaction product, (*Z*)-1,2-dimethyl-4-(pyridin-2-ylmethylene)-1*H*-imidazol-5(4*H*)-one immediately be purified, flushed with nitrogen, and stored at 0°C in the dark. For purification, column chromatography on alumina was used with ethyl acetate as the eluent.

#### Experimental

The 1,2-dimethyl-1*H*-imidazol-5(4*H*)-one was synthesized according to Wu and Burgess,<sup>5</sup> while the 3-butyl-1,2-dimethyl-1*H*-imidazol-3-ium hydroxide was obtained following the Ranu and Banerjee procedure.<sup>6</sup>

#### Synthesis of (*Z*)-1,2-dimethyl-4-(pyridin-2-ylmethylene)-1*H*-imidazol-5(4*H*)-one

To a solution of 1,2-dimethyl-1*H*-imidazol-5(4*H*)-one (2.18 g, 19.5 mmol) in benzene (15 mL), 2-pyridinecarbaldehyde (2.09 g, 19.5 mmol) was added followed by 3-butyl-1,2-dimethyl-1*H*-imidazol-3-ium hydroxide (0.23 g, 1.35 mmol). The solution was stirred at room temperature for 30 min. Solvent was removed under vacuum (rotovap), followed by re-dissolving the residue in ethyl acetate. The solution was applied on top of a neutral alumina column and elution was

continued with ethyl acetate (ca. 250 mL). The chromatographically homogeneous fractions containing (**PyMDI**) were combined and the solvent was removed under vacuum to yield yellow solid. Yield: 3.0 g (15.9 mmol, 76%); mp 115–117 °C (decomp.)

$^1\text{H NMR}$  (500 MHz,  $\text{CDCl}_3$ )  $\delta$  = 8.68 (ddd, 1H,  $J_{\text{HH}}$  = 0.9 Hz, 1.7 Hz, 4.8 Hz); 8.57 (dt, 1H,  $J_{\text{HH}}$  = 0.9 Hz, 8.0 Hz); 7.72 (dt, 1H,  $J_{\text{HH}}$  = 1.8 Hz, 7.6 Hz); 7.22 (s, 1H); 7.20 (ddd, 1H,  $J_{\text{HH}}$  = 1.1 Hz, 4.8 Hz, 7.5 Hz); 3.18 (s, 3H); 2.39 (s, 3H).

$^{13}\text{C NMR}$  (75 MHz,  $\text{CDCl}_3$ )  $\delta$  = 170.51, 164.68, 153.40, 150.05, 140.77, 136.22, 127.43, 126.76, 123.34, 26.60, 15.82.

**EIMS:**  $m/z$  201.1(66); 173.1(10); 118.1(13); 56(100).

**Anal. Calcd** for  $\text{C}_{11}\text{H}_{11}\text{N}_3\text{O}$ : C, 65.66; H, 5.51; N, 20.88.

**Found:** C, 65.73; H, 5.62; N, 20.71.

#### Synthesis of Zn complex of (*Z*)-1,2-dimethyl-4-(pyridin-2-ylmethylene)-1H-imidazol-5(4*H*)-one

To a solution of (*Z*)-1,2-dimethyl-4-(pyridin-2-ylmethylene)-1H-imidazol-5(4*H*)-one (60 mg, 0.3 mmol) in methanol (4 mL) a zinc nitrate hexahydrate (92 mg, 0.31 mmol) in methanol (4 mL) solution was added. Crystallization ensued almost immediately. The reaction mixture was left for crystallization at 4 °C for 24 h., The solid was filtered and washed with cold methanol to yield 56 mg of yellow solid, mp 214-216 °C (decomp.)

$^1\text{H NMR}$  (300 MHz,  $\text{CD}_3\text{OD}$ )  $\delta$  = 8.68 (d, 1H,  $J_{\text{HH}}$  = 5.4 Hz); 8.26 (dt, 1H,  $J_{\text{HH}}$  = 1.8 Hz, 7.8 Hz); 8.10 (d, 1H,  $J_{\text{HH}}$  = 7.8 Hz); 7.74 (t, 1H,  $J_{\text{HH}}$  = 6.3 Hz); 7.34 (s, 1H); 3.33 (s, 3H); 2.55 (broad s, 3H).

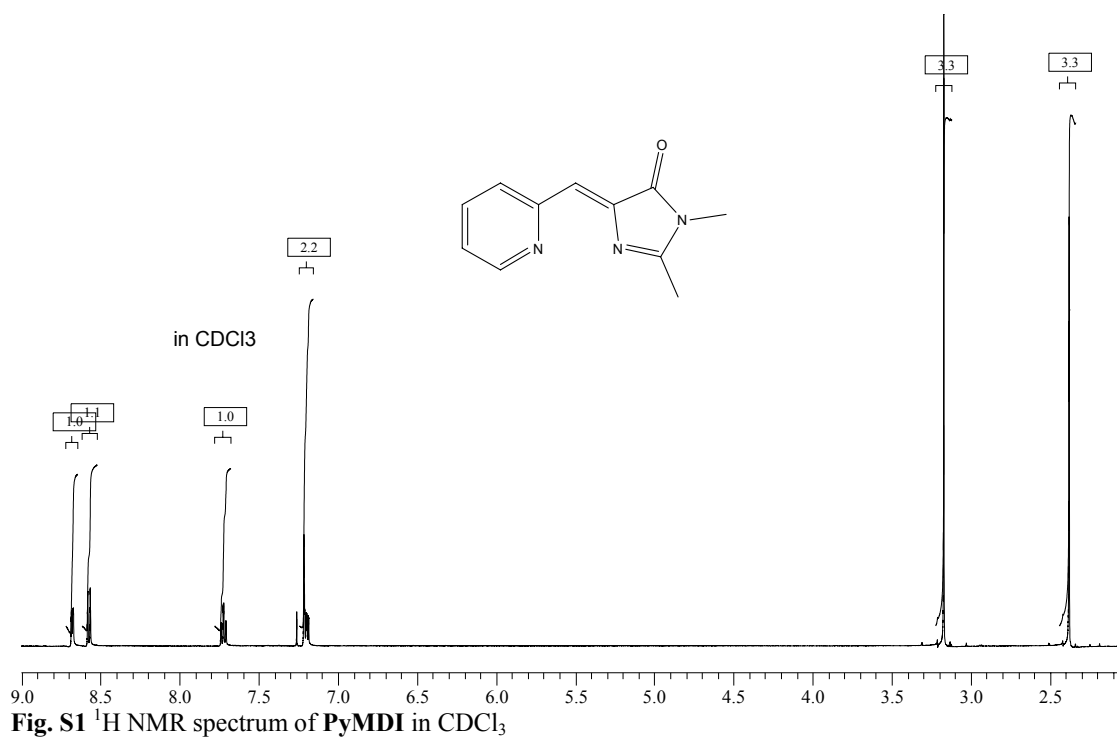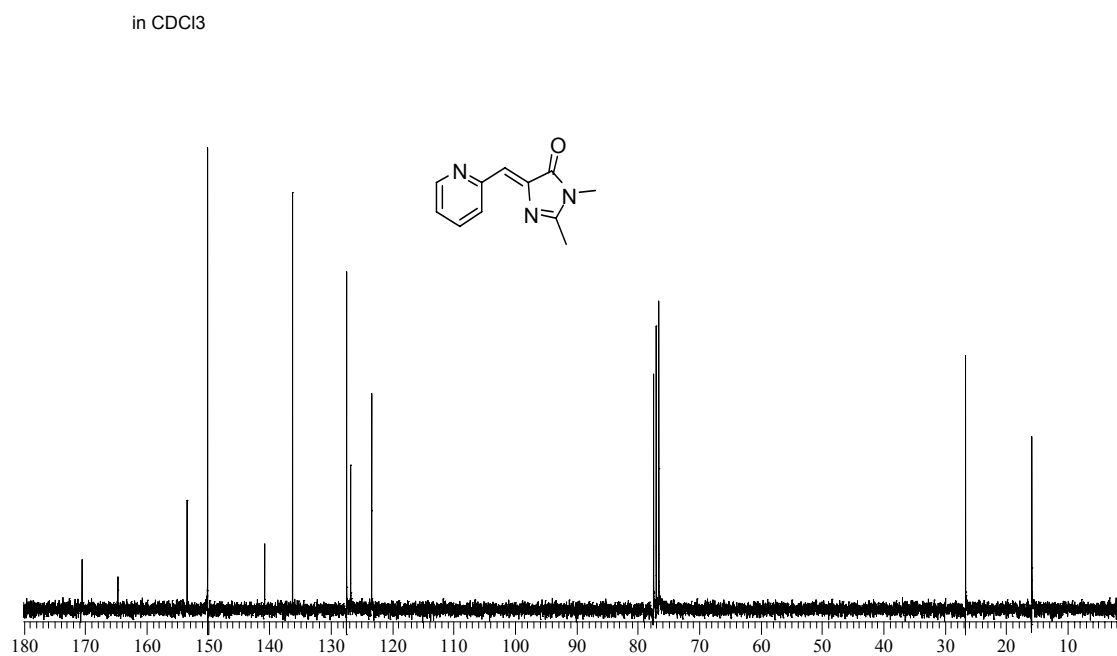

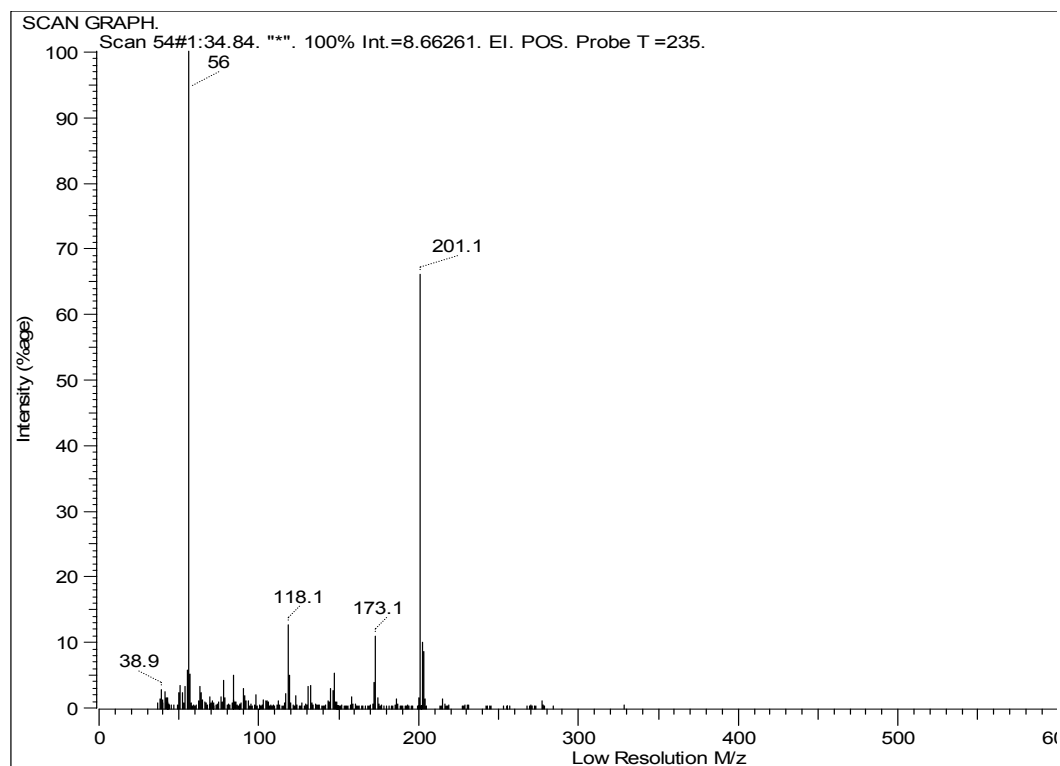

Fig. S3. Mass spectrum of PyMDI taken in EI mode.

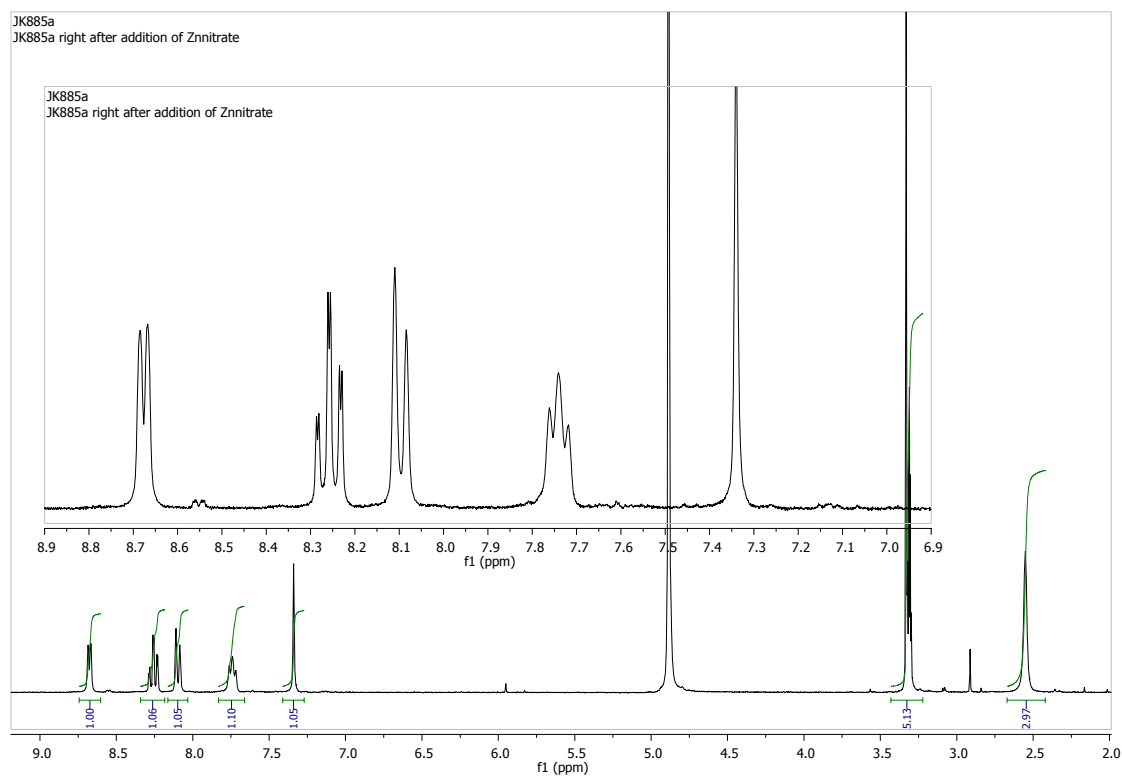

Fig. S4.  $^1\text{H}$  NMR spectrum of Zn-PyMDI in  $\text{CD}_3\text{OD}$ . The N-methylamide resonance, a singlet at 3.33 ppm is superimposed on solvent signals while a singlet at 4.89 ppm belongs to water.

## 2. Stoichiometry of Zn(II) binding to PyMDI in solution.

The stoichiometry of complexation in solution was determined using a Job plot according to method described in Ref 8. Referring to Fig. S5, the maximum occurs at a mole fraction of 0.5, implying a 1:1 complex.

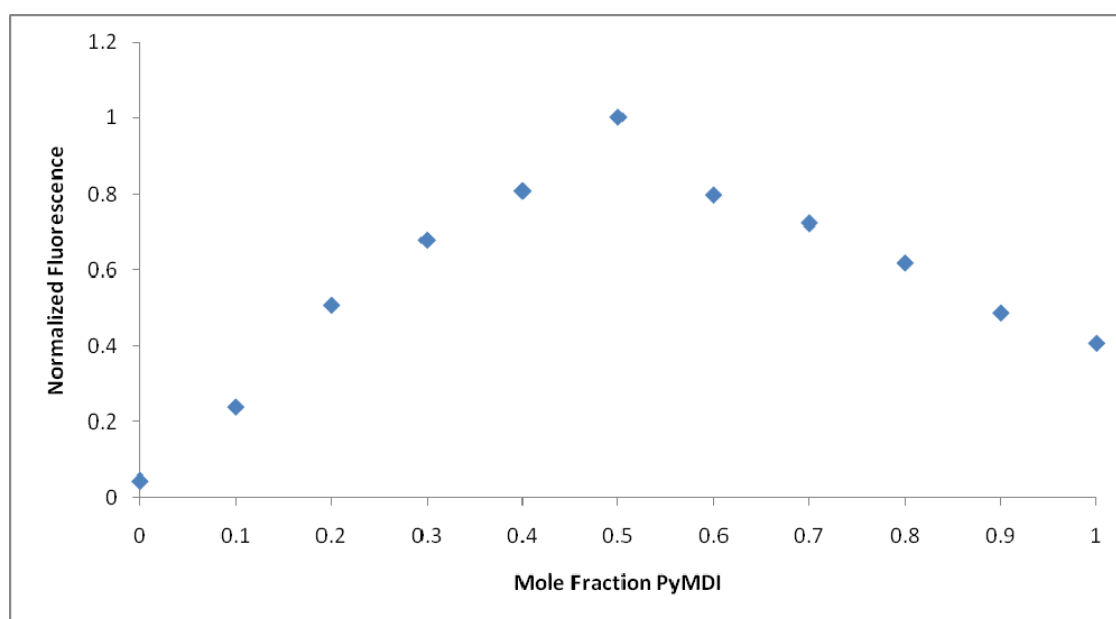

**Fig. S5** Job Plot. Fluorescence was monitored at 424 nm,

Given a 1:1 stoichiometry, a Benesi-Hildebrand plot can be created to determine the binding constant of the complex. It should be noted that Benesi-Hildebrand plots are only applicable to 1:1 complexes. The Benesi-Hildebrand equation for fluorescence spectroscopy is given by:<sup>9</sup>

$$1/(I-I_0) = 1/(I_1-I_0) + 1/(K_f(I_1-I_0)) \times 1/[Zn^{2+}]. \quad (S1)$$

where  $I_0$  is the emission intensity of a free ligand, and  $I$  is the emission intensity of the complex at some Zn(II) concentration. Additionally, it is noted that the Benesi-Hildebrand plot confirms the assumptions made from the Job plot with respect to the 1:1 stoichiometric relationship. The

Benesi-Hildebrand plot in Fig. S6 (shown below) yields an  $R^2 = 0.997$  and gives a binding constant for **Zn(PyMDI)** of  $1892 \text{ M}^{-1}$ .(Table S1).

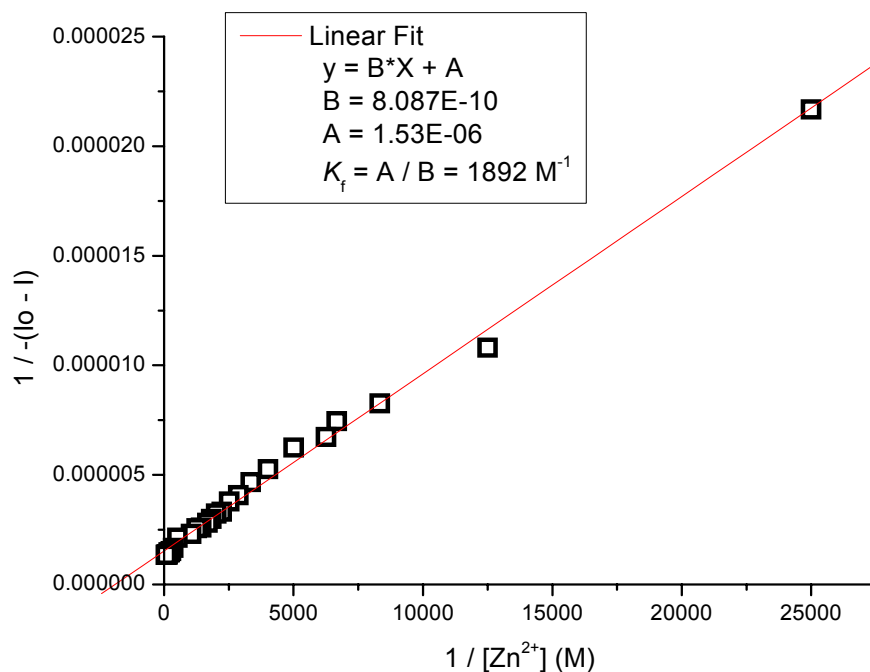

**Fig. S6** Benesi-Hildebrand plot for titration of **PyMDI** with  $\text{Zn}^{2+}$  in solution.

**Table S1.** Formation and stability constants of various Zinc(II) complexes.

| Compound              | $K_f (\text{M}^{-1})$ | $K_d (\text{M})$       |
|-----------------------|-----------------------|------------------------|
| Zn(PyMBDI)            | 1.89E+03              | 5.29E-04               |
| Zn(en)                | 5.13E+05              | 1.95E-06 <sup>10</sup> |
| Zn(en) <sub>2</sub>   | 2.35E+10              | 4.26E-11 <sup>10</sup> |
| Zn(en) <sub>3</sub>   | 1.23E+12              | 8.12E-13 <sup>10</sup> |
| Zn(phen)              | 2.70E+06              | 3.70E-07 <sup>11</sup> |
| Zn(phen) <sub>2</sub> | 3.70E+12              | 2.70E-13 <sup>11</sup> |
| Zn(phen) <sub>3</sub> | 1.00E+17              | 1.00E-17 <sup>11</sup> |
| Zn(acac)              | 1.18E+05              | 8.50E-06 <sup>12</sup> |
| Zn(acac) <sub>2</sub> | 1.05E+09              | 9.50E-10 <sup>12</sup> |

### 3. Spectral behavior of PyMDI in methanol/water mixtures.

In order to detect possible **PyMDI** photobasicity dependence on water concentration in methanol/water mixtures, absorption and emission spectra of **PyMDI** were obtained for 5% increments. It is noted that as water concentration increases, the absorption maximum demonstrate a bathochromic shift (Fig S7). At the same time, in all cases only emission from the neutral species was observed (Fig S8). The intensity decreased as the water concentration increased, due to an unestablished quenching mechanism that may involve a diabatic protonation of the chromophore.

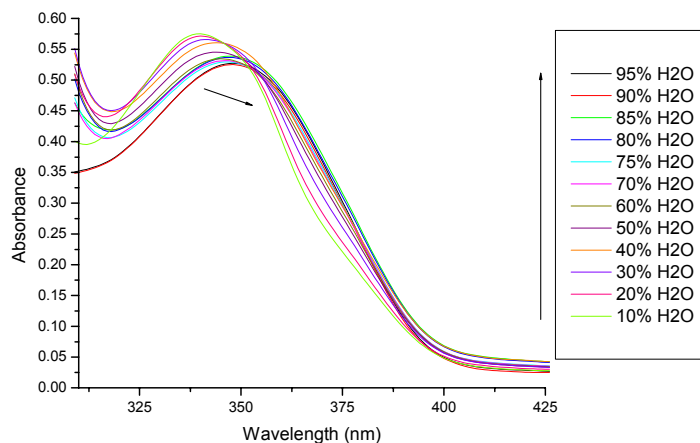

**Fig. S7.** Absorption Spectra of **PyMDI** in MeOH/H<sub>2</sub>O.

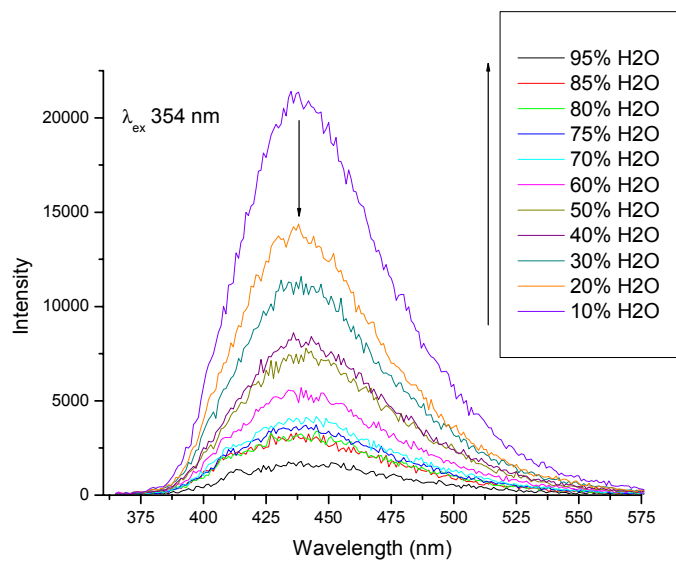

**Fig. S8:** MeOH/H<sub>2</sub>O Emission Spectra of PyMDI.

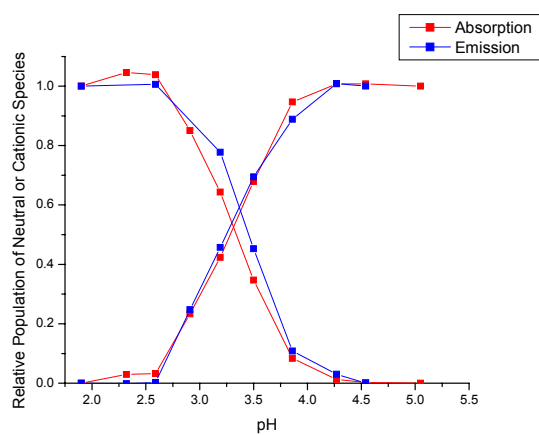

**Fig. S9.** pH titration curves of PyMDI with Zn<sup>2+</sup> in 1/1 vol MeOH/H<sub>2</sub>O solution.



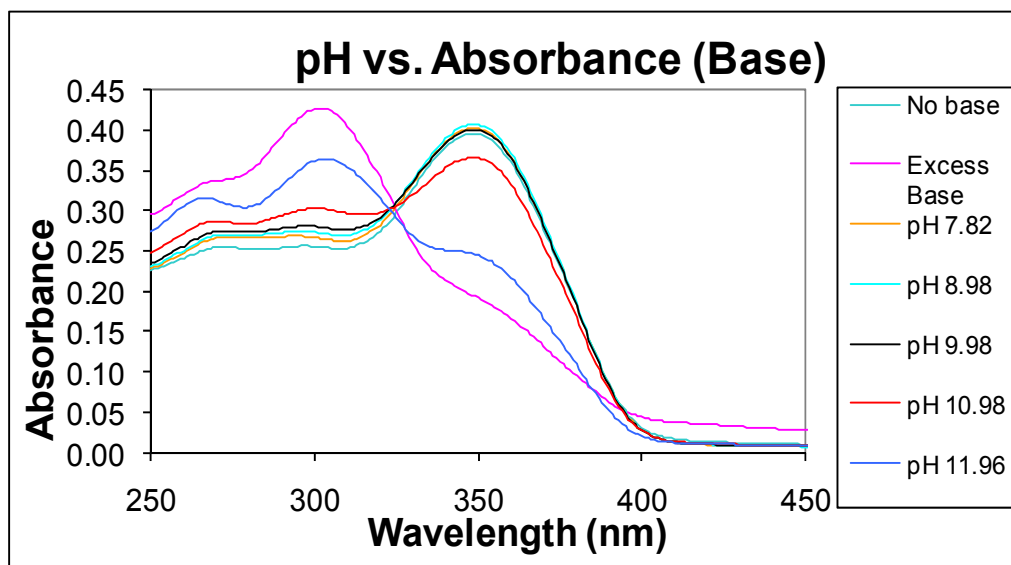

Fig. S10. Absorption spectra of PyMDI in MeOH/H<sub>2</sub>O (1/1 vol) at basic pH values.

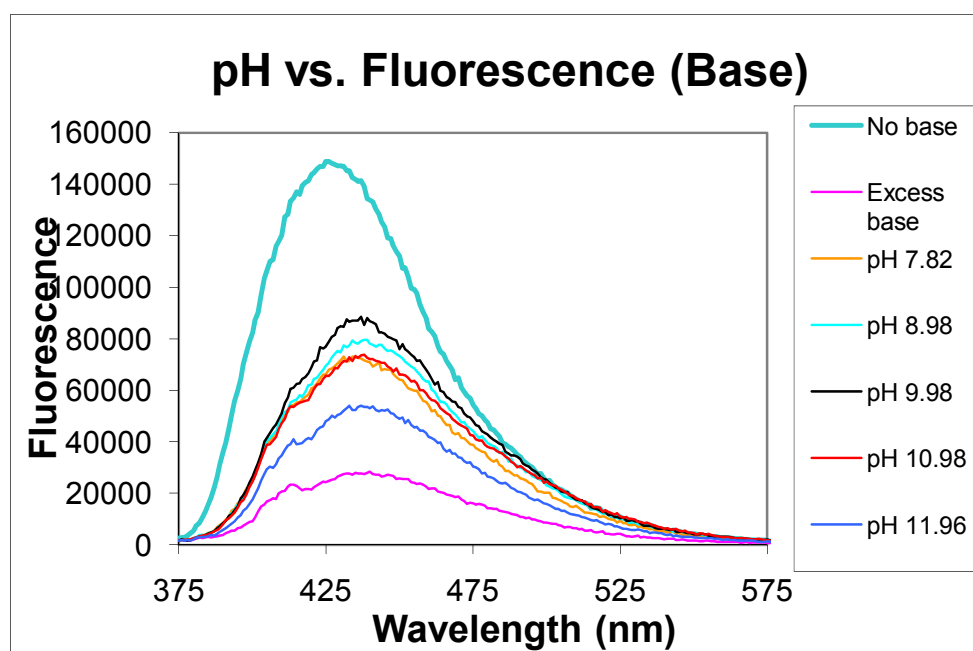

Fig. S11. Emission spectra of PyMDI in MeOH/H<sub>2</sub>O (1/1 vol) at basic pH values ( $\lambda_{\text{ex}} = 344\text{nm}$ ).

#### 4. pH-stability of Zn-PyMDI complex.

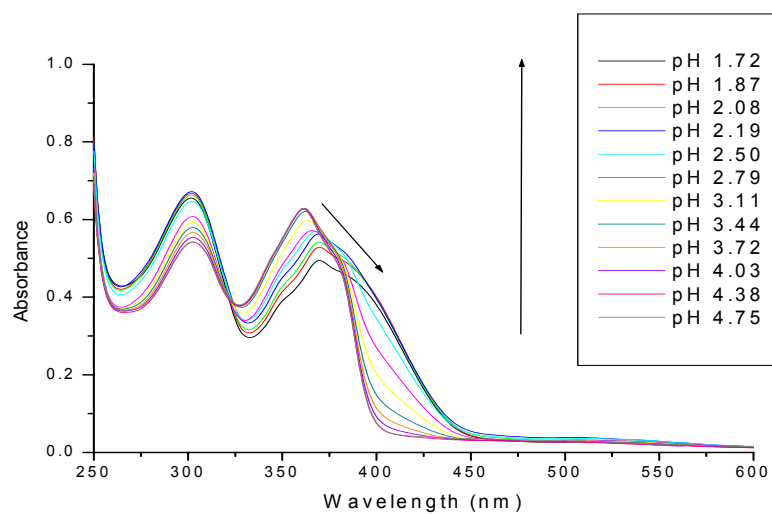

**Fig. S12** Absorption Spectra of **PyMDI** at various pH and 20 mM Zn(II) mixture.

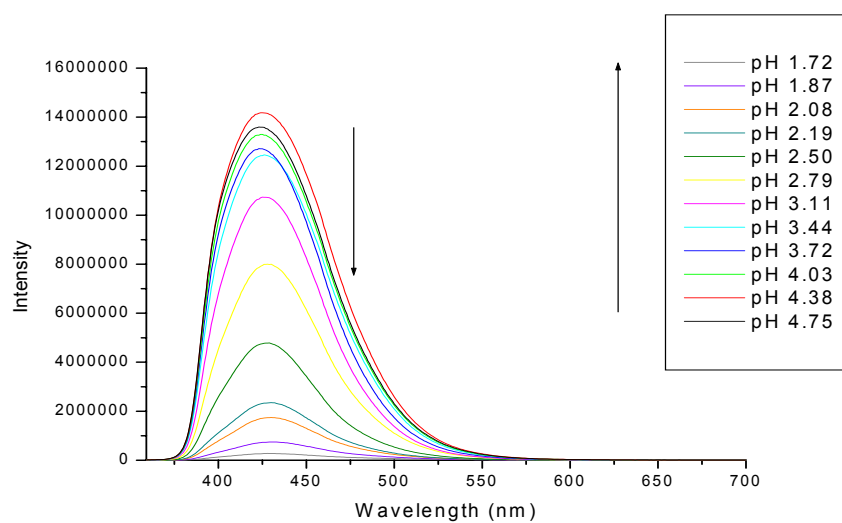

**Fig. S13.** Emission Spectra of **PyMDI** and 20 mM Zn(II) mixture at various pH ( $\lambda_{\text{ex}} = 344\text{nm}$ ).

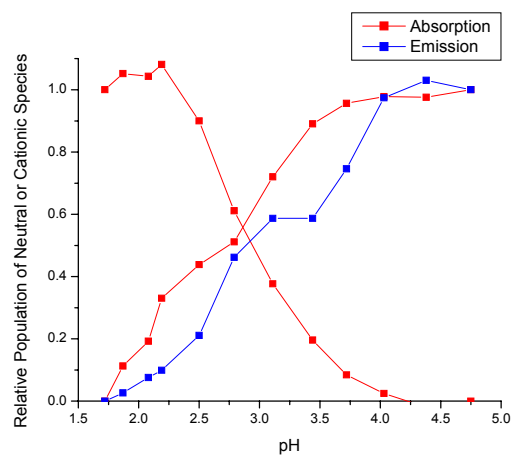

Fig. S14. Titration curve for PyMDI:20 mM Zn(II) mixture.

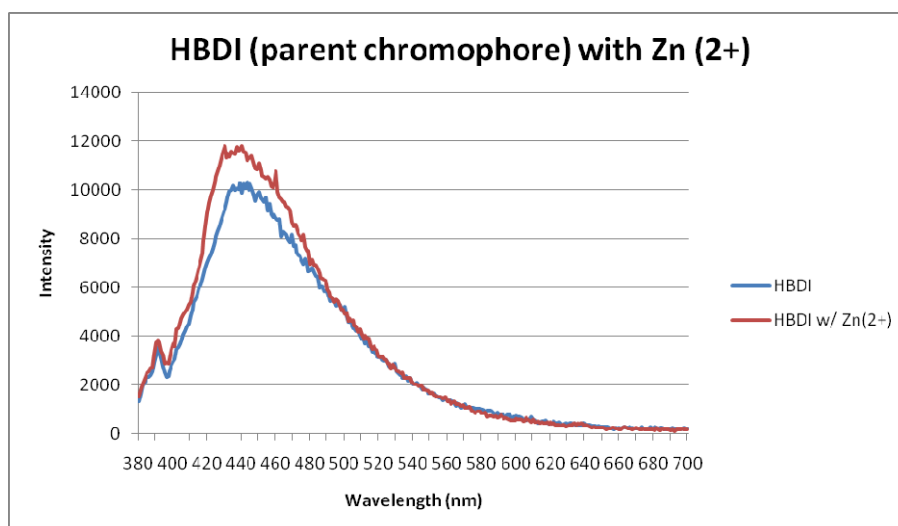

Fig. S15. Fluorescence spectra of parent chromophore (HBDI) in the presence of 15 mM Zn<sup>2+</sup>

## 5. Crystallography Data for Zn-PyMDI complex.

### Note:

The best crystals obtained for crystal structure determination were twinned and disordered. The data would not support refining all atoms as anisotropic. In finding the solution, several space groups were tried including orthorhombic and  $P2_1/n$ , however, no solution could be found. We believe that the disordered methanol solvent molecules--one full molecule and 0.7 additional molecule complicate the structure refinement in addition to the asymmetry of the coordinated  $\text{NO}_3$  groups on the Zn atoms. There is pseudo  $2/c$  or  $2/n$  symmetry but this is not satisfied by all the atoms.

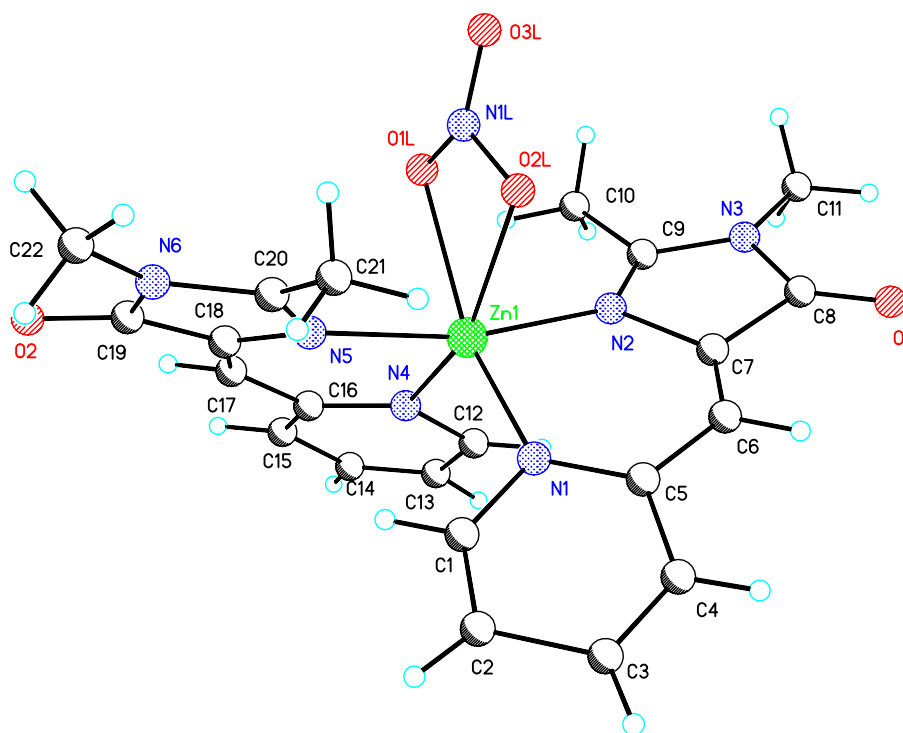

Fig. S16. Molecular structure of Zn-PyMDI.

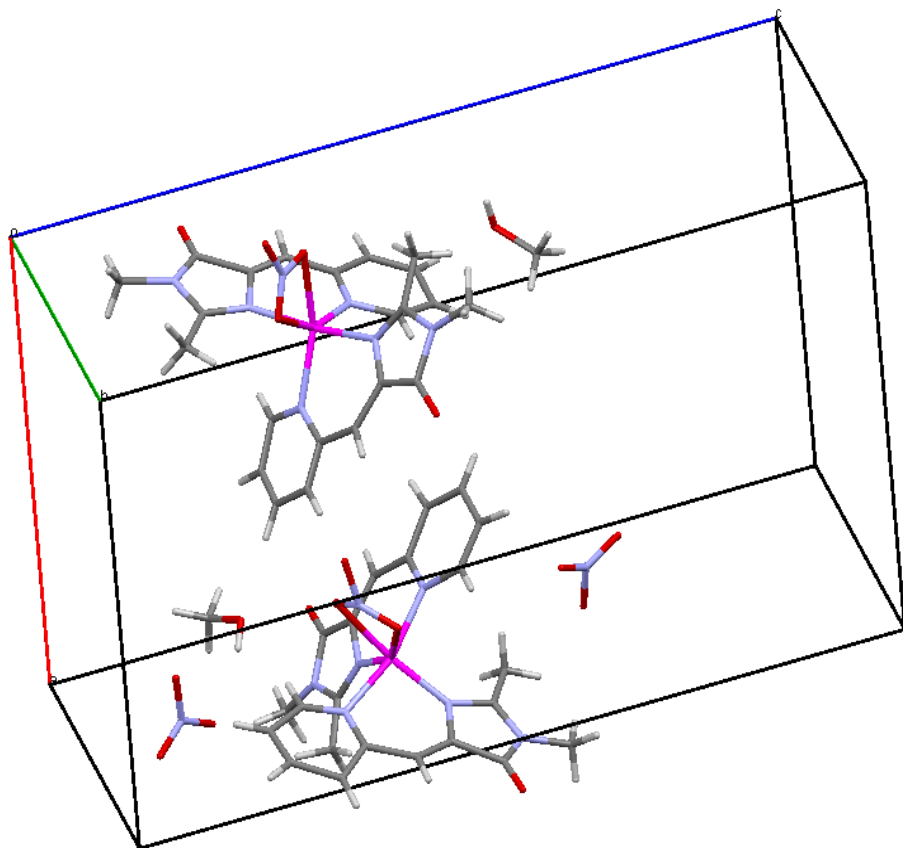

**Fig. S17.** Crystal structure of **Zn-PyMDI** complex. The asymmetric crystal unit contains two molecules of the complex compensated by two nitrate ions placed outside the coordination sphere of zinc in addition to 1.7 molecules of methanol. Stick style was selected for clarity.

**Table S2.** Crystal data and structure refinement for JK885a.

|                                   |                                                                                          |                             |
|-----------------------------------|------------------------------------------------------------------------------------------|-----------------------------|
| Identification code               | jk885a                                                                                   |                             |
| Empirical formula                 | C <sub>45.70</sub> H <sub>50.80</sub> N <sub>16</sub> O <sub>17.70</sub> Zn <sub>2</sub> |                             |
| Formula weight                    | 1238.16                                                                                  |                             |
| Temperature                       | 173(2) K                                                                                 |                             |
| Wavelength                        | 1.54178 Å                                                                                |                             |
| Crystal system                    | Monoclinic                                                                               |                             |
| Space group                       | Pn                                                                                       |                             |
| Unit cell dimensions              | a = 15.4288(11) Å                                                                        | $\alpha = 90^\circ$ .       |
|                                   | b = 7.6422(6) Å                                                                          | $\beta = 90.335(6)^\circ$ . |
|                                   | c = 22.522(2) Å                                                                          | $\gamma = 90^\circ$ .       |
| Volume                            | 2655.5(4) Å <sup>3</sup>                                                                 |                             |
| Z                                 | 2                                                                                        |                             |
| Density (calculated)              | 1.548 Mg/m <sup>3</sup>                                                                  |                             |
| Absorption coefficient            | 1.873 mm <sup>-1</sup>                                                                   |                             |
| F(000)                            | 1277                                                                                     |                             |
| Crystal size                      | 0.12 x 0.09 x 0.02 mm <sup>3</sup>                                                       |                             |
| Theta range for data collection   | 3.46 to 66.59°.                                                                          |                             |
| Index ranges                      | -18 ≤ h ≤ 18, -9 ≤ k ≤ 9, -26 ≤ l ≤ 26                                                   |                             |
| Reflections collected             | 9768                                                                                     |                             |
| Independent reflections           | 6142 [R(int) = 0.0627]                                                                   |                             |
| Completeness to theta = 66.59°    | 91.9 %                                                                                   |                             |
| Absorption correction             | Semi-empirical from equivalents                                                          |                             |
| Max. and min. transmission        | 0.9635 and 0.8134                                                                        |                             |
| Refinement method                 | Full-matrix least-squares on F <sup>2</sup>                                              |                             |
| Data / restraints / parameters    | 6142 / 0 / 611                                                                           |                             |
| Goodness-of-fit on F <sup>2</sup> | 1.029                                                                                    |                             |
| Final R indices [I > 2σ(I)]       | R1 = 0.0634, wR2 = 0.1399                                                                |                             |
| R indices (all data)              | R1 = 0.1316, wR2 = 0.1730                                                                |                             |
| Absolute structure parameter      | 0.23(9)                                                                                  |                             |
| Largest diff. peak and hole       | 0.342 and -0.395 e.Å <sup>-3</sup>                                                       |                             |

**Table S3.** Atomic coordinates ( $\times 10^4$ ) and equivalent isotropic displacement parameters ( $\text{\AA}^2 \times 10^3$ ) for JK885a.  $U(\text{eq})$  is defined as one third of the trace of the orthogonalized  $U^{ij}$  tensor.

|       | x        | y         | z        | $U(\text{eq})$ |
|-------|----------|-----------|----------|----------------|
| C(1)  | 2787(12) | 3230(20)  | 4553(8)  | 54(5)          |
| C(2)  | 2314(11) | 4300(20)  | 4904(8)  | 54(5)          |
| C(3)  | 1395(12) | 4510(20)  | 4700(7)  | 50(4)          |
| C(4)  | 1185(12) | 3600(20)  | 4194(8)  | 52(5)          |
| C(5)  | 1768(13) | 2470(20)  | 3865(8)  | 54(5)          |
| C(6)  | 1468(11) | 1660(20)  | 3326(7)  | 45(4)          |
| C(7)  | 1886(11) | 870(20)   | 2938(8)  | 52(5)          |
| C(8)  | 1530(11) | 70(30)    | 2333(7)  | 53(5)          |
| C(9)  | 2974(13) | -270(30)  | 2392(8)  | 55(5)          |
| C(10) | 3835(13) | -880(30)  | 2191(10) | 74(6)          |
| C(11) | 2172(10) | -1290(30) | 1464(7)  | 65(6)          |
| C(12) | 4262(12) | 3260(30)  | 2816(9)  | 64(6)          |
| C(13) | 4925(15) | 4200(30)  | 2531(10) | 78(7)          |
| C(14) | 5734(16) | 4220(30)  | 2684(11) | 79(7)          |
| C(15) | 5965(13) | 3350(30)  | 3178(9)  | 64(6)          |
| C(16) | 5369(11) | 2510(30)  | 3476(9)  | 56(6)          |
| C(17) | 5615(12) | 1700(30)  | 4009(10) | 67(6)          |
| C(18) | 5158(11) | 830(20)   | 4482(7)  | 40(4)          |
| C(19) | 5554(14) | 300(30)   | 4986(10) | 64(6)          |
| C(20) | 4153(11) | -390(30)  | 4963(9)  | 58(5)          |
| C(21) | 3327(10) | -950(20)  | 5221(8)  | 60(5)          |
| C(22) | 4915(15) | -1350(30) | 5894(9)  | 84(7)          |
| N(1)  | 2610(9)  | 2280(20)  | 4029(7)  | 57(4)          |
| N(2)  | 2851(9)  | 420(19)   | 2924(8)  | 57(4)          |
| N(3)  | 2224(11) | -610(20)  | 2091(8)  | 60(4)          |
| N(4)  | 4544(10) | 2397(19)  | 3278(6)  | 46(4)          |
| N(5)  | 4306(10) | 460(20)   | 4486(6)  | 46(4)          |
| N(6)  | 4873(9)  | -590(20)  | 5336(7)  | 49(4)          |
| O(1)  | 818(9)   | 150(20)   | 2163(6)  | 75(4)          |
| O(2)  | 6338(9)  | 430(20)   | 5187(6)  | 76(4)          |
| N(1L) | 3637(15) | -2746(13) | 3689(10) | 65(3)          |

|        |           |           |          |        |
|--------|-----------|-----------|----------|--------|
| O(1L)  | 4214(9)   | -1860(20) | 3493(7)  | 77(4)  |
| O(2L)  | 2936(8)   | -1878(17) | 3896(5)  | 48(3)  |
| O(3L)  | 3510(20)  | -4285(13) | 3647(13) | 151(6) |
| Zn(1)  | 3563(4)   | 736(2)    | 3687(3)  | 50(1)  |
| C(1B)  | 7563(15)  | 5950(30)  | 4791(11) | 86(7)  |
| C(2B)  | 6920(12)  | 5410(30)  | 5142(9)  | 61(5)  |
| C(3B)  | 6035(9)   | 5511(19)  | 4936(7)  | 44(4)  |
| C(4B)  | 5939(11)  | 6140(20)  | 4421(7)  | 52(4)  |
| C(5B)  | 6568(10)  | 7030(20)  | 4034(7)  | 48(4)  |
| C(6B)  | 6383(10)  | 7904(19)  | 3501(7)  | 42(4)  |
| C(7B)  | 6935(11)  | 8600(20)  | 3094(8)  | 47(4)  |
| C(8B)  | 6624(11)  | 9620(20)  | 2627(7)  | 41(4)  |
| C(9B)  | 8073(10)  | 9720(20)  | 2720(7)  | 42(4)  |
| C(10B) | 8944(11)  | 10230(20) | 2543(9)  | 66(5)  |
| C(11B) | 7327(13)  | 11430(30) | 1877(9)  | 93(6)  |
| C(12B) | 9555(10)  | 6050(20)  | 2604(7)  | 38(4)  |
| C(13B) | 10207(14) | 5270(30)  | 2246(11) | 76(6)  |
| C(14B) | 10969(14) | 5390(30)  | 2462(10) | 90(7)  |
| C(15B) | 11247(11) | 6330(20)  | 3012(8)  | 59(5)  |
| C(16B) | 10506(10) | 6770(20)  | 3298(7)  | 44(4)  |
| C(17B) | 10698(13) | 7670(20)  | 3868(9)  | 64(5)  |
| C(18B) | 10216(11) | 8540(20)  | 4239(8)  | 46(4)  |
| C(19B) | 10521(16) | 9650(30)  | 4776(10) | 75(6)  |
| C(20B) | 9102(13)  | 9840(30)  | 4688(9)  | 61(5)  |
| C(21B) | 8193(11)  | 10470(20) | 4810(9)  | 63(5)  |
| C(22B) | 9680(10)  | 11810(20) | 5449(7)  | 58(4)  |
| N(1B)  | 7409(9)   | 6820(20)  | 4218(6)  | 45(4)  |
| N(2B)  | 7875(9)   | 8736(19)  | 3123(6)  | 43(3)  |
| N(3B)  | 7358(10)  | 10380(20) | 2374(7)  | 64(5)  |
| N(4B)  | 9682(10)  | 6680(20)  | 3090(7)  | 57(4)  |
| N(5B)  | 9318(9)   | 8640(20)  | 4229(7)  | 58(4)  |
| N(6B)  | 9774(10)  | 10467(19) | 4949(7)  | 53(4)  |
| O(1B)  | 5869(7)   | 9927(15)  | 2438(6)  | 49(3)  |
| O(2B)  | 11217(10) | 9740(20)  | 4974(7)  | 104(6) |
| N(1BL) | 8652(18)  | 3739(17)  | 3672(11) | 78(4)  |
| O(1BL) | 9007(9)   | 4670(20)  | 4050(8)  | 70(4)  |



|        |          |          |         |        |
|--------|----------|----------|---------|--------|
| O(2BL) | 8134(10) | 4510(20) | 3302(7) | 71(4)  |
| O(3BL) | 8253(8)  | 2187(12) | 3685(7) | 100(5) |
| Zn(1B) | 8568(4)  | 7224(2)  | 3686(3) | 52(1)  |
| N(1A)  | 8909(11) | 6520(30) | 1015(7) | 67(4)  |
| O(1A)  | 8659     | 7773     | 1280    | 144(7) |
| O(2A)  | 9459     | 6738     | 678     | 128(5) |
| O(3A)  | 8619     | 4895     | 1141    | 121(6) |
| N(2A)  | 8242(12) | 6150(30) | 6369(9) | 94(7)  |
| O(4A)  | 8584     | 4993     | 6167    | 99(5)  |
| O(5A)  | 8424     | 7735     | 6148    | 92(5)  |
| O(6A)  | 7780     | 6071     | 6825    | 146(6) |
| O(1S)  | 11(8)    | 6720(20) | 5534(6) | 65(4)  |
| C(1S)  | 610(12)  | 7320(30) | 5991(8) | 91(7)  |
| O(2S)  | 7082(13) | 6540(30) | 1877(8) | 65(5)  |
| C(2S)  | 6610(15) | 7090(30) | 1413(9) | 50(6)  |

---

**Table S4.** Bond lengths [ $\text{\AA}$ ] and angles [ $^\circ$ ] for JK885a.

|              |           |              |           |
|--------------|-----------|--------------|-----------|
| C(1)-C(2)    | 1.35(2)   | C(15)-C(16)  | 1.31(3)   |
| C(1)-N(1)    | 1.41(2)   | C(15)-H(15A) | 0.9500    |
| C(1)-H(1A)   | 0.9500    | C(16)-N(4)   | 1.35(2)   |
| C(2)-C(3)    | 1.50(2)   | C(16)-C(17)  | 1.40(3)   |
| C(2)-H(2)    | 0.9500    | C(17)-C(18)  | 1.44(3)   |
| C(3)-C(4)    | 1.37(2)   | C(17)-H(17A) | 0.9500    |
| C(3)-H(3A)   | 0.9500    | C(18)-N(5)   | 1.345(19) |
| C(4)-C(5)    | 1.45(2)   | C(18)-C(19)  | 1.35(3)   |
| C(4)-H(4A)   | 0.9500    | C(19)-O(2)   | 1.29(2)   |
| C(5)-N(1)    | 1.36(2)   | C(19)-N(6)   | 1.48(2)   |
| C(5)-C(6)    | 1.44(2)   | C(20)-N(5)   | 1.28(2)   |
| C(6)-C(7)    | 1.24(2)   | C(20)-N(6)   | 1.40(2)   |
| C(6)-H(6A)   | 0.9500    | C(20)-C(21)  | 1.47(2)   |
| C(7)-N(2)    | 1.53(2)   | C(21)-H(21A) | 0.9800    |
| C(7)-C(8)    | 1.59(2)   | C(21)-H(21B) | 0.9800    |
| C(8)-O(1)    | 1.164(18) | C(21)-H(21C) | 0.9800    |
| C(8)-N(3)    | 1.31(2)   | C(22)-N(6)   | 1.39(2)   |
| C(9)-N(2)    | 1.32(2)   | C(22)-H(22A) | 0.9800    |
| C(9)-N(3)    | 1.36(2)   | C(22)-H(22B) | 0.9800    |
| C(9)-C(10)   | 1.48(3)   | C(22)-H(22C) | 0.9800    |
| C(10)-H(10A) | 0.9800    | N(1)-Zn(1)   | 2.040(15) |
| C(10)-H(10B) | 0.9800    | N(2)-Zn(1)   | 2.050(17) |
| C(10)-H(10C) | 0.9800    | N(4)-Zn(1)   | 2.184(15) |
| C(11)-N(3)   | 1.51(2)   | N(5)-Zn(1)   | 2.137(12) |
| C(11)-H(11A) | 0.9800    | N(1L)-O(3L)  | 1.197(14) |
| C(11)-H(11B) | 0.9800    | N(1L)-O(1L)  | 1.20(2)   |
| C(11)-H(11C) | 0.9800    | N(1L)-O(2L)  | 1.35(2)   |
| C(12)-N(4)   | 1.30(2)   | O(1L)-Zn(1)  | 2.270(16) |
| C(12)-C(13)  | 1.41(3)   | O(2L)-Zn(1)  | 2.270(13) |
| C(12)-H(12A) | 0.9500    | C(1B)-C(2B)  | 1.34(3)   |
| C(13)-C(14)  | 1.29(3)   | C(1B)-N(1B)  | 1.47(3)   |
| C(13)-H(13A) | 0.9500    | C(1B)-H(1BA) | 0.9500    |
| C(14)-C(15)  | 1.34(3)   | C(2B)-C(3B)  | 1.44(2)   |
| C(14)-H(14A) | 0.9500    | C(2B)-H(2BA) | 0.9500    |

|               |           |               |           |
|---------------|-----------|---------------|-----------|
| C(3B)-C(4B)   | 1.26(2)   | C(18B)-C(19B) | 1.55(3)   |
| C(3B)-H(3BA)  | 0.9500    | C(19B)-O(2B)  | 1.16(2)   |
| C(4B)-C(5B)   | 1.47(2)   | C(19B)-N(6B)  | 1.37(2)   |
| C(4B)-H(4BA)  | 0.9500    | C(20B)-N(6B)  | 1.28(2)   |
| C(5B)-N(1B)   | 1.370(19) | C(20B)-N(5B)  | 1.42(3)   |
| C(5B)-C(6B)   | 1.40(2)   | C(20B)-C(21B) | 1.51(3)   |
| C(6B)-C(7B)   | 1.36(2)   | C(21B)-H(21D) | 0.9800    |
| C(6B)-H(6BA)  | 0.9500    | C(21B)-H(21E) | 0.9800    |
| C(7B)-C(8B)   | 1.39(2)   | C(21B)-H(21F) | 0.9800    |
| C(7B)-N(2B)   | 1.46(2)   | C(22B)-N(6B)  | 1.53(2)   |
| C(8B)-O(1B)   | 1.259(17) | C(22B)-H(22D) | 0.9800    |
| C(8B)-N(3B)   | 1.40(2)   | C(22B)-H(22E) | 0.9800    |
| C(9B)-N(2B)   | 1.22(2)   | C(22B)-H(22F) | 0.9800    |
| C(9B)-N(3B)   | 1.44(2)   | N(1B)-Zn(1B)  | 2.181(14) |
| C(9B)-C(10B)  | 1.46(2)   | N(2B)-Zn(1B)  | 2.017(14) |
| C(10B)-H(10D) | 0.9800    | N(4B)-Zn(1B)  | 2.226(16) |
| C(10B)-H(10E) | 0.9800    | N(5B)-Zn(1B)  | 1.997(16) |
| C(10B)-H(10F) | 0.9800    | N(1BL)-O(1BL) | 1.23(3)   |
| C(11B)-N(3B)  | 1.38(2)   | N(1BL)-O(2BL) | 1.29(2)   |
| C(11B)-H(11D) | 0.9800    | N(1BL)-O(3BL) | 1.337(19) |
| C(11B)-H(11E) | 0.9800    | O(1BL)-Zn(1B) | 2.224(15) |
| C(11B)-H(11F) | 0.9800    | O(2BL)-Zn(1B) | 2.346(15) |
| C(12B)-N(4B)  | 1.212(19) | N(1A)-O(2A)   | 1.153(17) |
| C(12B)-C(13B) | 1.42(3)   | N(1A)-O(1A)   | 1.193(19) |
| C(12B)-H(12B) | 0.9500    | N(1A)-O(3A)   | 1.351(19) |
| C(13B)-C(14B) | 1.27(2)   | N(2A)-O(4A)   | 1.13(2)   |
| C(13B)-H(13B) | 0.9500    | N(2A)-O(6A)   | 1.25(2)   |
| C(14B)-C(15B) | 1.49(3)   | N(2A)-O(5A)   | 1.34(2)   |
| C(14B)-H(14B) | 0.9500    | O(1S)-C(1S)   | 1.453(18) |
| C(15B)-C(16B) | 1.36(2)   | O(1S)-H(1S)   | 0.8400    |
| C(15B)-H(15B) | 0.9500    | C(1S)-H(1S1)  | 0.9800    |
| C(16B)-N(4B)  | 1.354(19) | C(1S)-H(1S2)  | 0.9800    |
| C(16B)-C(17B) | 1.49(2)   | C(1S)-H(1S3)  | 0.9800    |
| C(17B)-C(18B) | 1.30(2)   | O(2S)-C(2S)   | 1.34(3)   |
| C(17B)-H(17B) | 0.9500    | O(2S)-H(2S)   | 0.8400    |
| C(18B)-N(5B)  | 1.39(2)   | C(2S)-H(2S1)  | 0.9800    |

|                     |           |                     |           |
|---------------------|-----------|---------------------|-----------|
| C(2S)-H(2S2)        | 0.9800    | N(3)-C(11)-H(11A)   | 109.5     |
| C(2S)-H(2S3)        | 0.9800    | N(3)-C(11)-H(11B)   | 109.5     |
|                     |           | H(11A)-C(11)-H(11B) | 109.5     |
| C(2)-C(1)-N(1)      | 134.2(17) | N(3)-C(11)-H(11C)   | 109.5     |
| C(2)-C(1)-H(1A)     | 112.9     | H(11A)-C(11)-H(11C) | 109.5     |
| N(1)-C(1)-H(1A)     | 112.9     | H(11B)-C(11)-H(11C) | 109.5     |
| C(1)-C(2)-C(3)      | 113.5(16) | N(4)-C(12)-C(13)    | 112.4(18) |
| C(1)-C(2)-H(2)      | 123.3     | N(4)-C(12)-H(12A)   | 123.8     |
| C(3)-C(2)-H(2)      | 123.3     | C(13)-C(12)-H(12A)  | 123.8     |
| C(4)-C(3)-C(2)      | 114.7(17) | C(14)-C(13)-C(12)   | 126(2)    |
| C(4)-C(3)-H(3A)     | 122.7     | C(14)-C(13)-H(13A)  | 117.0     |
| C(2)-C(3)-H(3A)     | 122.7     | C(12)-C(13)-H(13A)  | 117.0     |
| C(3)-C(4)-C(5)      | 125.6(17) | C(13)-C(14)-C(15)   | 118(2)    |
| C(3)-C(4)-H(4A)     | 117.2     | C(13)-C(14)-H(14A)  | 121.1     |
| C(5)-C(4)-H(4A)     | 117.2     | C(15)-C(14)-H(14A)  | 121.1     |
| N(1)-C(5)-C(6)      | 119.2(16) | C(16)-C(15)-C(14)   | 118.9(19) |
| N(1)-C(5)-C(4)      | 121.3(16) | C(16)-C(15)-H(15A)  | 120.6     |
| C(6)-C(5)-C(4)      | 119.2(16) | C(14)-C(15)-H(15A)  | 120.6     |
| C(7)-C(6)-C(5)      | 129.5(16) | C(15)-C(16)-N(4)    | 122(2)    |
| C(7)-C(6)-H(6A)     | 115.3     | C(15)-C(16)-C(17)   | 117.9(17) |
| C(5)-C(6)-H(6A)     | 115.3     | N(4)-C(16)-C(17)    | 120.3(18) |
| C(6)-C(7)-N(2)      | 129.3(15) | C(16)-C(17)-C(18)   | 134.8(17) |
| C(6)-C(7)-C(8)      | 127.7(15) | C(16)-C(17)-H(17A)  | 112.6     |
| N(2)-C(7)-C(8)      | 103.0(15) | C(18)-C(17)-H(17A)  | 112.6     |
| O(1)-C(8)-N(3)      | 131.0(18) | N(5)-C(18)-C(19)    | 111.7(15) |
| O(1)-C(8)-C(7)      | 125.6(17) | N(5)-C(18)-C(17)    | 125.7(15) |
| N(3)-C(8)-C(7)      | 103.3(13) | C(19)-C(18)-C(17)   | 122.6(17) |
| N(2)-C(9)-N(3)      | 113.6(17) | O(2)-C(19)-C(18)    | 134(2)    |
| N(2)-C(9)-C(10)     | 122.3(16) | O(2)-C(19)-N(6)     | 120.9(17) |
| N(3)-C(9)-C(10)     | 123.4(17) | C(18)-C(19)-N(6)    | 105.4(16) |
| C(9)-C(10)-H(10A)   | 109.5     | N(5)-C(20)-N(6)     | 114.2(16) |
| C(9)-C(10)-H(10B)   | 109.5     | N(5)-C(20)-C(21)    | 130.1(17) |
| H(10A)-C(10)-H(10B) | 109.5     | N(6)-C(20)-C(21)    | 114.9(17) |
| C(9)-C(10)-H(10C)   | 109.5     | C(20)-C(21)-H(21A)  | 109.5     |
| H(10A)-C(10)-H(10C) | 109.5     | C(20)-C(21)-H(21B)  | 109.5     |
| H(10B)-C(10)-H(10C) | 109.5     | H(21A)-C(21)-H(21B) | 109.5     |

|                     |           |                    |           |
|---------------------|-----------|--------------------|-----------|
| C(20)-C(21)-H(21C)  | 109.5     | N(2)-Zn(1)-N(4)    | 94.8(5)   |
| H(21A)-C(21)-H(21C) | 109.5     | N(5)-Zn(1)-N(4)    | 92.5(5)   |
| H(21B)-C(21)-H(21C) | 109.5     | N(1)-Zn(1)-O(1L)   | 154.1(6)  |
| N(6)-C(22)-H(22A)   | 109.5     | N(2)-Zn(1)-O(1L)   | 88.3(6)   |
| N(6)-C(22)-H(22B)   | 109.5     | N(5)-Zn(1)-O(1L)   | 80.9(5)   |
| H(22A)-C(22)-H(22B) | 109.5     | N(4)-Zn(1)-O(1L)   | 96.8(5)   |
| N(6)-C(22)-H(22C)   | 109.5     | N(1)-Zn(1)-O(2L)   | 97.0(5)   |
| H(22A)-C(22)-H(22C) | 109.5     | N(2)-Zn(1)-O(2L)   | 80.9(5)   |
| H(22B)-C(22)-H(22C) | 109.5     | N(5)-Zn(1)-O(2L)   | 88.2(5)   |
| C(5)-N(1)-C(1)      | 110.6(15) | N(4)-Zn(1)-O(2L)   | 153.7(5)  |
| C(5)-N(1)-Zn(1)     | 130.6(13) | O(1L)-Zn(1)-O(2L)  | 57.3(2)   |
| C(1)-N(1)-Zn(1)     | 118.5(11) | C(2B)-C(1B)-N(1B)  | 122.8(19) |
| C(9)-N(2)-C(7)      | 104.7(15) | C(2B)-C(1B)-H(1BA) | 118.6     |
| C(9)-N(2)-Zn(1)     | 136.6(13) | N(1B)-C(1B)-H(1BA) | 118.6     |
| C(7)-N(2)-Zn(1)     | 118.2(11) | C(1B)-C(2B)-C(3B)  | 119.8(19) |
| C(8)-N(3)-C(9)      | 114.3(16) | C(1B)-C(2B)-H(2BA) | 120.1     |
| C(8)-N(3)-C(11)     | 119.2(15) | C(3B)-C(2B)-H(2BA) | 120.1     |
| C(9)-N(3)-C(11)     | 124.9(15) | C(4B)-C(3B)-C(2B)  | 115.0(16) |
| C(12)-N(4)-C(16)    | 122.7(17) | C(4B)-C(3B)-H(3BA) | 122.5     |
| C(12)-N(4)-Zn(1)    | 113.7(12) | C(2B)-C(3B)-H(3BA) | 122.5     |
| C(16)-N(4)-Zn(1)    | 123.6(13) | C(3B)-C(4B)-C(5B)  | 130.1(15) |
| C(20)-N(5)-C(18)    | 107.2(13) | C(3B)-C(4B)-H(4BA) | 114.9     |
| C(20)-N(5)-Zn(1)    | 131.0(13) | C(5B)-C(4B)-H(4BA) | 114.9     |
| C(18)-N(5)-Zn(1)    | 119.5(10) | N(1B)-C(5B)-C(6B)  | 120.2(14) |
| C(22)-N(6)-C(20)    | 128.5(16) | N(1B)-C(5B)-C(4B)  | 113.2(13) |
| C(22)-N(6)-C(19)    | 130.2(15) | C(6B)-C(5B)-C(4B)  | 126.5(13) |
| C(20)-N(6)-C(19)    | 101.3(15) | C(7B)-C(6B)-C(5B)  | 129.5(14) |
| O(3L)-N(1L)-O(1L)   | 130(2)    | C(7B)-C(6B)-H(6BA) | 115.2     |
| O(3L)-N(1L)-O(2L)   | 112(2)    | C(5B)-C(6B)-H(6BA) | 115.2     |
| O(1L)-N(1L)-O(2L)   | 116.5(10) | C(6B)-C(7B)-C(8B)  | 120.8(15) |
| N(1L)-O(1L)-Zn(1)   | 95.2(11)  | C(6B)-C(7B)-N(2B)  | 128.7(15) |
| N(1L)-O(2L)-Zn(1)   | 90.9(8)   | C(8B)-C(7B)-N(2B)  | 109.4(14) |
| N(1)-Zn(1)-N(2)     | 90.0(6)   | O(1B)-C(8B)-C(7B)  | 132.2(16) |
| N(1)-Zn(1)-N(5)     | 97.0(6)   | O(1B)-C(8B)-N(3B)  | 122.5(15) |
| N(2)-Zn(1)-N(5)     | 167.7(3)  | C(7B)-C(8B)-N(3B)  | 105.3(14) |
| N(1)-Zn(1)-N(4)     | 109.1(3)  | N(2B)-C(9B)-N(3B)  | 115.2(14) |

|                      |           |                      |           |
|----------------------|-----------|----------------------|-----------|
| N(2B)-C(9B)-C(10B)   | 127.2(16) | O(2B)-C(19B)-C(18B)  | 128(2)    |
| N(3B)-C(9B)-C(10B)   | 117.6(14) | N(6B)-C(19B)-C(18B)  | 102.6(17) |
| C(9B)-C(10B)-H(10D)  | 109.5     | N(6B)-C(20B)-N(5B)   | 112.5(17) |
| C(9B)-C(10B)-H(10E)  | 109.5     | N(6B)-C(20B)-C(21B)  | 123.1(18) |
| H(10D)-C(10B)-H(10E) | 109.5     | N(5B)-C(20B)-C(21B)  | 124.1(17) |
| C(9B)-C(10B)-H(10F)  | 109.5     | C(20B)-C(21B)-H(21D) | 109.5     |
| H(10D)-C(10B)-H(10F) | 109.5     | C(20B)-C(21B)-H(21E) | 109.5     |
| H(10E)-C(10B)-H(10F) | 109.5     | H(21D)-C(21B)-H(21E) | 109.5     |
| N(3B)-C(11B)-H(11D)  | 109.5     | C(20B)-C(21B)-H(21F) | 109.5     |
| N(3B)-C(11B)-H(11E)  | 109.5     | H(21D)-C(21B)-H(21F) | 109.5     |
| H(11D)-C(11B)-H(11E) | 109.5     | H(21E)-C(21B)-H(21F) | 109.5     |
| N(3B)-C(11B)-H(11F)  | 109.5     | N(6B)-C(22B)-H(22D)  | 109.5     |
| H(11D)-C(11B)-H(11F) | 109.5     | N(6B)-C(22B)-H(22E)  | 109.5     |
| H(11E)-C(11B)-H(11F) | 109.5     | H(22D)-C(22B)-H(22E) | 109.5     |
| N(4B)-C(12B)-C(13B)  | 124.6(17) | N(6B)-C(22B)-H(22F)  | 109.5     |
| N(4B)-C(12B)-H(12B)  | 117.7     | H(22D)-C(22B)-H(22F) | 109.5     |
| C(13B)-C(12B)-H(12B) | 117.7     | H(22E)-C(22B)-H(22F) | 109.5     |
| C(14B)-C(13B)-C(12B) | 114(2)    | C(5B)-N(1B)-C(1B)    | 117.8(16) |
| C(14B)-C(13B)-H(13B) | 123.0     | C(5B)-N(1B)-Zn(1B)   | 126.6(11) |
| C(12B)-C(13B)-H(13B) | 122.9     | C(1B)-N(1B)-Zn(1B)   | 114.7(12) |
| C(13B)-C(14B)-C(15B) | 128(2)    | C(9B)-N(2B)-C(7B)    | 105.4(13) |
| C(13B)-C(14B)-H(14B) | 116.2     | C(9B)-N(2B)-Zn(1B)   | 133.4(12) |
| C(15B)-C(14B)-H(14B) | 116.2     | C(7B)-N(2B)-Zn(1B)   | 120.7(11) |
| C(16B)-C(15B)-C(14B) | 105.9(15) | C(11B)-N(3B)-C(8B)   | 123.3(15) |
| C(16B)-C(15B)-H(15B) | 127.0     | C(11B)-N(3B)-C(9B)   | 131.9(15) |
| C(14B)-C(15B)-H(15B) | 127.0     | C(8B)-N(3B)-C(9B)    | 104.8(13) |
| N(4B)-C(16B)-C(15B)  | 128.0(15) | C(12B)-N(4B)-C(16B)  | 118.6(16) |
| N(4B)-C(16B)-C(17B)  | 120.2(15) | C(12B)-N(4B)-Zn(1B)  | 119.9(13) |
| C(15B)-C(16B)-C(17B) | 111.1(14) | C(16B)-N(4B)-Zn(1B)  | 120.6(11) |
| C(18B)-C(17B)-C(16B) | 132.8(17) | C(18B)-N(5B)-C(20B)  | 105.2(15) |
| C(18B)-C(17B)-H(17B) | 113.6     | C(18B)-N(5B)-Zn(1B)  | 123.7(13) |
| C(16B)-C(17B)-H(17B) | 113.6     | C(20B)-N(5B)-Zn(1B)  | 131.0(12) |
| C(17B)-C(18B)-N(5B)  | 126.2(17) | C(20B)-N(6B)-C(19B)  | 112.2(17) |
| C(17B)-C(18B)-C(19B) | 127.4(18) | C(20B)-N(6B)-C(22B)  | 120.6(16) |
| N(5B)-C(18B)-C(19B)  | 106.4(16) | C(19B)-N(6B)-C(22B)  | 126.7(16) |
| O(2B)-C(19B)-N(6B)   | 130(2)    | O(1BL)-N(1BL)-O(2BL) | 117.1(12) |

|                      |           |                     |       |
|----------------------|-----------|---------------------|-------|
| O(1BL)-N(1BL)-O(3BL) | 134(2)    | O(2S)-C(2S)-H(2S3)  | 109.8 |
| O(2BL)-N(1BL)-O(3BL) | 98(2)     | H(2S1)-C(2S)-H(2S3) | 109.5 |
| N(1BL)-O(1BL)-Zn(1B) | 96.8(11)  | H(2S2)-C(2S)-H(2S3) | 109.5 |
| N(1BL)-O(2BL)-Zn(1B) | 89.4(11)  |                     |       |
| N(5B)-Zn(1B)-N(2B)   | 112.2(3)  |                     |       |
| N(5B)-Zn(1B)-N(1B)   | 102.4(6)  |                     |       |
| N(2B)-Zn(1B)-N(1B)   | 89.6(5)   |                     |       |
| N(5B)-Zn(1B)-O(1BL)  | 94.4(6)   |                     |       |
| N(2B)-Zn(1B)-O(1BL)  | 153.4(6)  |                     |       |
| N(1B)-Zn(1B)-O(1BL)  | 85.5(5)   |                     |       |
| N(5B)-Zn(1B)-N(4B)   | 91.4(6)   |                     |       |
| N(2B)-Zn(1B)-N(4B)   | 97.8(6)   |                     |       |
| N(1B)-Zn(1B)-N(4B)   | 160.7(3)  |                     |       |
| O(1BL)-Zn(1B)-N(4B)  | 79.9(6)   |                     |       |
| N(5B)-Zn(1B)-O(2BL)  | 150.3(6)  |                     |       |
| N(2B)-Zn(1B)-O(2BL)  | 97.2(6)   |                     |       |
| N(1B)-Zn(1B)-O(2BL)  | 81.0(5)   |                     |       |
| O(1BL)-Zn(1B)-O(2BL) | 56.2(3)   |                     |       |
| N(4B)-Zn(1B)-O(2BL)  | 80.4(5)   |                     |       |
| O(2A)-N(1A)-O(1A)    | 117.0(16) |                     |       |
| O(2A)-N(1A)-O(3A)    | 121.1(15) |                     |       |
| O(1A)-N(1A)-O(3A)    | 121.6(13) |                     |       |
| O(4A)-N(2A)-O(6A)    | 124(2)    |                     |       |
| O(4A)-N(2A)-O(5A)    | 117.4(17) |                     |       |
| O(6A)-N(2A)-O(5A)    | 118.0(17) |                     |       |
| C(1S)-O(1S)-H(1S)    | 113.3     |                     |       |
| O(1S)-C(1S)-H(1S1)   | 109.7     |                     |       |
| O(1S)-C(1S)-H(1S2)   | 113.1     |                     |       |
| H(1S1)-C(1S)-H(1S2)  | 109.5     |                     |       |
| O(1S)-C(1S)-H(1S3)   | 105.6     |                     |       |
| H(1S1)-C(1S)-H(1S3)  | 109.5     |                     |       |
| H(1S2)-C(1S)-H(1S3)  | 109.5     |                     |       |
| C(2S)-O(2S)-H(2S)    | 106.2     |                     |       |
| O(2S)-C(2S)-H(2S1)   | 105.4     |                     |       |
| O(2S)-C(2S)-H(2S2)   | 113.1     |                     |       |
| H(2S1)-C(2S)-H(2S2)  | 109.5     |                     |       |

---

Symmetry transformations used to generate equivalent atoms:

**Table S5.** Anisotropic displacement parameters ( $\text{\AA}^2 \times 10^3$ ) for JK885a. The anisotropic displacement factor exponent takes the form:  $-2\pi^2 [ h^2 a^{*2} U^{11} + \dots + 2 h k a^* b^* U^{12} ]$

---

|       | $U^{11}$ | $U^{22}$ | $U^{33}$ | $U^{23}$ | $U^{13}$ | $U^{12}$ |
|-------|----------|----------|----------|----------|----------|----------|
| C(1)  | 63(10)   | 41(10)   | 56(11)   | -21(9)   | 2(9)     | -23(8)   |
| C(2)  | 49(8)    | 73(12)   | 39(8)    | 18(8)    | -3(7)    | -15(8)   |
| C(3)  | 68(11)   | 47(9)    | 35(8)    | -2(7)    | 7(8)     | 4(8)     |
| C(4)  | 68(10)   | 40(9)    | 49(10)   | 15(8)    | 27(9)    | 8(8)     |
| C(5)  | 77(13)   | 51(12)   | 34(9)    | 2(8)     | 7(9)     | 8(10)    |
| C(6)  | 58(9)    | 50(10)   | 26(7)    | 4(7)     | 12(7)    | 28(8)    |
| C(7)  | 37(8)    | 63(12)   | 56(11)   | 17(9)    | -22(8)   | -19(8)   |
| C(8)  | 31(8)    | 101(14)  | 28(7)    | 5(8)     | -2(7)    | 5(8)     |
| C(9)  | 67(12)   | 64(13)   | 34(9)    | 18(9)    | -5(9)    | 3(10)    |
| C(10) | 73(12)   | 80(15)   | 68(13)   | -25(11)  | 6(11)    | 16(11)   |
| C(11) | 30(7)    | 128(17)  | 39(9)    | 2(11)    | -6(7)    | 5(9)     |
| C(12) | 56(10)   | 81(14)   | 56(11)   | -14(11)  | 19(9)    | -22(10)  |
| C(13) | 110(16)  | 61(13)   | 62(12)   | 15(9)    | 16(11)   | -40(11)  |
| C(14) | 87(14)   | 71(14)   | 80(15)   | -33(11)  | 46(13)   | -35(11)  |
| C(15) | 57(11)   | 74(14)   | 61(13)   | -11(10)  | -2(10)   | -17(10)  |
| C(16) | 33(9)    | 72(14)   | 64(12)   | -19(10)  | 8(9)     | 11(9)    |
| C(17) | 40(9)    | 69(14)   | 93(15)   | -25(12)  | -2(10)   | 16(9)    |
| C(18) | 41(8)    | 51(11)   | 27(7)    | -6(7)    | 15(7)    | -10(7)   |
| C(19) | 72(12)   | 44(10)   | 77(14)   | -6(9)    | 15(11)   | 15(9)    |
| C(20) | 36(9)    | 72(14)   | 67(13)   | -2(11)   | 8(9)     | 10(9)    |
| C(21) | 36(8)    | 81(14)   | 62(11)   | -35(10)  | -1(8)    | -12(9)   |
| C(22) | 133(17)  | 60(13)   | 59(13)   | 16(11)   | 9(12)    | 16(13)   |
| N(1)  | 29(6)    | 73(10)   | 69(10)   | 20(8)    | 5(6)     | 11(6)    |
| N(2)  | 43(7)    | 49(10)   | 80(11)   | 16(8)    | 18(7)    | -3(7)    |
| N(3)  | 67(10)   | 56(10)   | 56(9)    | -14(7)   | 12(8)    | -12(8)   |

---



|        |         |         |         |         |         |         |
|--------|---------|---------|---------|---------|---------|---------|
| N(4)   | 63(9)   | 48(8)   | 26(6)   | 2(6)    | 6(6)    | 11(7)   |
| N(5)   | 49(8)   | 68(11)  | 21(6)   | 4(6)    | -16(6)  | 6(8)    |
| N(6)   | 40(7)   | 77(11)  | 32(7)   | -12(7)  | -4(6)   | -14(7)  |
| O(1)   | 44(6)   | 123(11) | 60(8)   | -5(7)   | 14(6)   | 1(7)    |
| O(2)   | 49(7)   | 119(12) | 59(8)   | 2(7)    | -23(6)  | -3(7)   |
| N(1L)  | 84(8)   | 57(6)   | 54(5)   | -14(11) | 12(6)   | -28(10) |
| O(1L)  | 60(8)   | 92(12)  | 79(10)  | 15(9)   | 6(8)    | -2(9)   |
| O(2L)  | 43(6)   | 66(9)   | 34(6)   | -1(6)   | 13(6)   | 4(6)    |
| O(3L)  | 212(12) | 67(7)   | 174(12) | -44(14) | 113(9)  | 17(15)  |
| Zn(1)  | 42(1)   | 60(1)   | 47(1)   | 1(2)    | 0(1)    | -5(2)   |
| N(1B)  | 41(7)   | 57(9)   | 38(7)   | 1(6)    | 7(6)    | 5(6)    |
| N(2B)  | 36(6)   | 51(8)   | 40(7)   | 3(7)    | 0(6)    | -13(6)  |
| N(3B)  | 52(8)   | 99(13)  | 42(8)   | 15(8)   | 10(7)   | -5(9)   |
| N(4B)  | 64(9)   | 49(9)   | 58(9)   | -7(7)   | 0(7)    | 15(7)   |
| N(5B)  | 46(7)   | 74(11)  | 53(9)   | 20(8)   | 16(7)   | -12(7)  |
| N(6B)  | 63(9)   | 50(9)   | 45(8)   | -13(7)  | -5(8)   | -5(8)   |
| O(1B)  | 28(4)   | 46(6)   | 72(7)   | -11(5)  | -6(5)   | 8(4)    |
| O(2B)  | 84(9)   | 158(16) | 68(9)   | -38(9)  | -6(8)   | -19(9)  |
| N(1BL) | 98(10)  | 81(9)   | 54(6)   | 35(12)  | 29(7)   | 3(13)   |
| O(1BL) | 48(7)   | 79(10)  | 85(10)  | -4(8)   | -8(7)   | 0(7)    |
| O(2BL) | 72(9)   | 87(11)  | 55(8)   | -2(8)   | 13(7)   | -7(8)   |
| O(3BL) | 156(13) | 49(6)   | 96(7)   | -11(7)  | 17(11)  | 1(6)    |
| Zn(1B) | 41(1)   | 56(1)   | 58(1)   | 1(2)    | -1(1)   | 1(2)    |
| N(1A)  | 67(10)  | 83(11)  | 50(9)   | 14(8)   | 8(8)    | 4(8)    |
| O(1A)  | 195(18) | 136(18) | 102(13) | -11(11) | 17(13)  | 35(14)  |
| O(2A)  | 134(11) | 125(12) | 126(13) | 12(9)   | 50(10)  | 4(9)    |
| O(3A)  | 127(12) | 74(11)  | 162(15) | 10(11)  | -44(11) | -20(10) |
| N(2A)  | 56(10)  | 135(19) | 91(15)  | -26(12) | -7(10)  | -34(11) |
| O(4A)  | 117(12) | 87(12)  | 91(10)  | -27(9)  | 22(9)   | -14(10) |
| O(5A)  | 58(7)   | 51(9)   | 167(15) | 0(9)    | -1(8)   | 1(6)    |
| O(6A)  | 97(9)   | 284(19) | 56(7)   | -54(9)  | 39(7)   | -91(11) |
| O(1S)  | 53(7)   | 94(10)  | 47(6)   | -20(6)  | -8(6)   | 1(6)    |
| C(1S)  | 88(12)  | 113(18) | 72(12)  | 13(11)  | -50(10) | -24(11) |
| O(2S)  | 79(12)  | 71(12)  | 47(10)  | 6(9)    | 34(9)   | -7(10)  |
| C(2S)  | 63(13)  | 55(13)  | 33(11)  | -2(10)  | 37(10)  | -9(11)  |

---

**Table S6.** Hydrogen coordinates ( $\times 10^4$ ) and isotropic displacement parameters ( $\text{\AA}^2 \times 10^{-3}$ )

|        | x    | y     | z    | U(eq) |
|--------|------|-------|------|-------|
| H(1A)  | 3367 | 3094  | 4688 | 64    |
| H(2)   | 2544 | 4857  | 5247 | 64    |
| H(3A)  | 988  | 5221  | 4904 | 60    |
| H(4A)  | 610  | 3710  | 4047 | 63    |
| H(6A)  | 862  | 1747  | 3254 | 54    |
| H(10A) | 4267 | -642  | 2501 | 111   |
| H(10B) | 3995 | -251  | 1827 | 111   |
| H(10C) | 3813 | -2135 | 2110 | 111   |
| H(11A) | 1570 | -1250 | 1325 | 98    |
| H(11B) | 2380 | -2502 | 1454 | 98    |
| H(11C) | 2533 | -566  | 1205 | 98    |
| H(12A) | 3675 | 3255  | 2686 | 77    |
| H(13A) | 4763 | 4881  | 2196 | 93    |
| H(14A) | 6151 | 4832  | 2455 | 95    |
| H(15A) | 6552 | 3338  | 3308 | 77    |
| H(17A) | 6224 | 1718  | 4073 | 80    |
| H(21A) | 2851 | -629  | 4953 | 89    |
| H(21B) | 3247 | -375  | 5606 | 89    |
| H(21C) | 3332 | -2223 | 5276 | 89    |
| H(22A) | 4364 | -1939 | 5978 | 127   |
| H(22B) | 5023 | -448  | 6194 | 127   |
| H(22C) | 5386 | -2211 | 5903 | 127   |
| H(1BA) | 8144 | 5768  | 4918 | 103   |
| H(2BA) | 7045 | 4955  | 5526 | 74    |
| H(3BA) | 5560 | 5134  | 5170 | 52    |
| H(4BA) | 5372 | 6027  | 4258 | 62    |
| H(6BA) | 5784 | 8035  | 3411 | 50    |
| H(10D) | 9370 | 9673  | 2808 | 98    |
| H(10E) | 9002 | 11501 | 2568 | 98    |
| H(10F) | 9047 | 9847  | 2134 | 98    |
| H(11D) | 6722 | 11620 | 1759 | 140   |

|        |       |       |      |     |
|--------|-------|-------|------|-----|
| H(11E) | 7638  | 10864 | 1552 | 140 |
| H(11F) | 7599  | 12560 | 1967 | 140 |
| H(12B) | 8980  | 6077  | 2451 | 46  |
| H(13B) | 10083 | 4708  | 1879 | 92  |
| H(14B) | 11414 | 4810  | 2248 | 108 |
| H(15B) | 11824 | 6578  | 3136 | 71  |
| H(17B) | 11289 | 7608  | 3984 | 77  |
| H(21D) | 8203  | 11281 | 5146 | 95  |
| H(21E) | 7823  | 9466  | 4904 | 95  |
| H(21F) | 7964  | 11068 | 4458 | 95  |
| H(22D) | 9075  | 12194 | 5473 | 88  |
| H(22E) | 10050 | 12827 | 5366 | 88  |
| H(22F) | 9856  | 11284 | 5827 | 88  |
| H(1S)  | -121  | 5662  | 5566 | 97  |
| H(1S1) | 343   | 8262  | 6221 | 136 |
| H(1S2) | 1165  | 7722  | 5832 | 136 |
| H(1S3) | 708   | 6304  | 6249 | 136 |
| H(2S)  | 7602  | 6738  | 1792 | 98  |
| H(2S1) | 6020  | 7242  | 1565 | 75  |
| H(2S2) | 6602  | 6263  | 1082 | 75  |
| H(2S3) | 6830  | 8226  | 1275 | 75  |

---

**Table S7.** Torsion angles [°] for JK885a.

---

|                         |            |
|-------------------------|------------|
| N(1)-C(1)-C(2)-C(3)     | 1(3)       |
| C(1)-C(2)-C(3)-C(4)     | 0(2)       |
| C(2)-C(3)-C(4)-C(5)     | 1(3)       |
| C(3)-C(4)-C(5)-N(1)     | -3(3)      |
| C(3)-C(4)-C(5)-C(6)     | -176.9(17) |
| N(1)-C(5)-C(6)-C(7)     | -6(3)      |
| C(4)-C(5)-C(6)-C(7)     | 168.7(18)  |
| C(5)-C(6)-C(7)-N(2)     | 3(3)       |
| C(5)-C(6)-C(7)-C(8)     | -177.2(18) |
| C(6)-C(7)-C(8)-O(1)     | 2(3)       |
| N(2)-C(7)-C(8)-O(1)     | -178.4(19) |
| C(6)-C(7)-C(8)-N(3)     | 179.8(19)  |
| N(2)-C(7)-C(8)-N(3)     | -0.5(18)   |
| N(4)-C(12)-C(13)-C(14)  | 1(3)       |
| C(12)-C(13)-C(14)-C(15) | -4(4)      |
| C(13)-C(14)-C(15)-C(16) | 1(3)       |
| C(14)-C(15)-C(16)-N(4)  | 5(3)       |
| C(14)-C(15)-C(16)-C(17) | -176.4(19) |
| C(15)-C(16)-C(17)-C(18) | 173(2)     |
| N(4)-C(16)-C(17)-C(18)  | -9(3)      |
| C(16)-C(17)-C(18)-N(5)  | 6(4)       |
| C(16)-C(17)-C(18)-C(19) | -173(2)    |
| N(5)-C(18)-C(19)-O(2)   | -177(2)    |
| C(17)-C(18)-C(19)-O(2)  | 2(3)       |
| N(5)-C(18)-C(19)-N(6)   | 3(2)       |
| C(17)-C(18)-C(19)-N(6)  | -177.4(16) |
| C(6)-C(5)-N(1)-C(1)     | 177.1(16)  |
| C(4)-C(5)-N(1)-C(1)     | 3(2)       |
| C(6)-C(5)-N(1)-Zn(1)    | -9(3)      |
| C(4)-C(5)-N(1)-Zn(1)    | 176.9(13)  |
| C(2)-C(1)-N(1)-C(5)     | -2(3)      |
| C(2)-C(1)-N(1)-Zn(1)    | -177.1(18) |
| N(3)-C(9)-N(2)-C(7)     | -10(2)     |
| C(10)-C(9)-N(2)-C(7)    | 179.4(18)  |

|                        |            |
|------------------------|------------|
| N(3)-C(9)-N(2)-Zn(1)   | 162.1(13)  |
| C(10)-C(9)-N(2)-Zn(1)  | -8(3)      |
| C(6)-C(7)-N(2)-C(9)    | -174.1(19) |
| C(8)-C(7)-N(2)-C(9)    | 6.2(18)    |
| C(6)-C(7)-N(2)-Zn(1)   | 12(2)      |
| C(8)-C(7)-N(2)-Zn(1)   | -167.7(10) |
| O(1)-C(8)-N(3)-C(9)    | 172(2)     |
| C(7)-C(8)-N(3)-C(9)    | -6(2)      |
| O(1)-C(8)-N(3)-C(11)   | 6(3)       |
| C(7)-C(8)-N(3)-C(11)   | -171.9(15) |
| N(2)-C(9)-N(3)-C(8)    | 11(2)      |
| C(10)-C(9)-N(3)-C(8)   | -178.7(19) |
| N(2)-C(9)-N(3)-C(11)   | 176.2(17)  |
| C(10)-C(9)-N(3)-C(11)  | -13(3)     |
| C(13)-C(12)-N(4)-C(16) | 4(3)       |
| C(13)-C(12)-N(4)-Zn(1) | -174.9(13) |
| C(15)-C(16)-N(4)-C(12) | -8(3)      |
| C(17)-C(16)-N(4)-C(12) | 173.5(18)  |
| C(15)-C(16)-N(4)-Zn(1) | 171.4(15)  |
| C(17)-C(16)-N(4)-Zn(1) | -7(2)      |
| N(6)-C(20)-N(5)-C(18)  | 4(2)       |
| C(21)-C(20)-N(5)-C(18) | 172.7(19)  |
| N(6)-C(20)-N(5)-Zn(1)  | 166.0(12)  |
| C(21)-C(20)-N(5)-Zn(1) | -25(3)     |
| C(19)-C(18)-N(5)-C(20) | -4(2)      |
| C(17)-C(18)-N(5)-C(20) | 176.4(18)  |
| C(19)-C(18)-N(5)-Zn(1) | -169.0(12) |
| C(17)-C(18)-N(5)-Zn(1) | 12(2)      |
| N(5)-C(20)-N(6)-C(22)  | 176(2)     |
| C(21)-C(20)-N(6)-C(22) | 5(3)       |
| N(5)-C(20)-N(6)-C(19)  | -2(2)      |
| C(21)-C(20)-N(6)-C(19) | -172.5(16) |
| O(2)-C(19)-N(6)-C(22)  | 1(3)       |
| C(18)-C(19)-N(6)-C(22) | -178.8(19) |
| O(2)-C(19)-N(6)-C(20)  | 179.1(18)  |
| C(18)-C(19)-N(6)-C(20) | -0.9(19)   |

|                         |            |
|-------------------------|------------|
| O(3L)-N(1L)-O(1L)-Zn(1) | 168(3)     |
| O(2L)-N(1L)-O(1L)-Zn(1) | 2(2)       |
| O(3L)-N(1L)-O(2L)-Zn(1) | -170(2)    |
| O(1L)-N(1L)-O(2L)-Zn(1) | -2(2)      |
| C(5)-N(1)-Zn(1)-N(2)    | 17.5(16)   |
| C(1)-N(1)-Zn(1)-N(2)    | -168.7(14) |
| C(5)-N(1)-Zn(1)-N(5)    | -152.3(16) |
| C(1)-N(1)-Zn(1)-N(5)    | 21.4(14)   |
| C(5)-N(1)-Zn(1)-N(4)    | 112.6(15)  |
| C(1)-N(1)-Zn(1)-N(4)    | -73.7(15)  |
| C(5)-N(1)-Zn(1)-O(1L)   | -69(2)     |
| C(1)-N(1)-Zn(1)-O(1L)   | 105.1(17)  |
| C(5)-N(1)-Zn(1)-O(2L)   | -63.3(16)  |
| C(1)-N(1)-Zn(1)-O(2L)   | 110.4(13)  |
| C(9)-N(2)-Zn(1)-N(1)    | 171.7(19)  |
| C(7)-N(2)-Zn(1)-N(1)    | -16.9(12)  |
| C(9)-N(2)-Zn(1)-N(5)    | -63(4)     |
| C(7)-N(2)-Zn(1)-N(5)    | 108(3)     |
| C(9)-N(2)-Zn(1)-N(4)    | 62.6(19)   |
| C(7)-N(2)-Zn(1)-N(4)    | -126.0(12) |
| C(9)-N(2)-Zn(1)-O(1L)   | -34.1(19)  |
| C(7)-N(2)-Zn(1)-O(1L)   | 137.3(12)  |
| C(9)-N(2)-Zn(1)-O(2L)   | -91.2(19)  |
| C(7)-N(2)-Zn(1)-O(2L)   | 80.2(12)   |
| C(20)-N(5)-Zn(1)-N(1)   | 71.5(19)   |
| C(18)-N(5)-Zn(1)-N(1)   | -127.8(13) |
| C(20)-N(5)-Zn(1)-N(2)   | -53(5)     |
| C(18)-N(5)-Zn(1)-N(2)   | 108(3)     |
| C(20)-N(5)-Zn(1)-N(4)   | -179.0(18) |
| C(18)-N(5)-Zn(1)-N(4)   | -18.3(14)  |
| C(20)-N(5)-Zn(1)-O(1L)  | -82.4(18)  |
| C(18)-N(5)-Zn(1)-O(1L)  | 78.3(14)   |
| C(20)-N(5)-Zn(1)-O(2L)  | -25.3(18)  |
| C(18)-N(5)-Zn(1)-O(2L)  | 135.4(14)  |
| C(12)-N(4)-Zn(1)-N(1)   | -65.3(15)  |
| C(16)-N(4)-Zn(1)-N(1)   | 115.3(13)  |

|                             |            |
|-----------------------------|------------|
| C(12)-N(4)-Zn(1)-N(2)       | 26.3(14)   |
| C(16)-N(4)-Zn(1)-N(2)       | -153.0(14) |
| C(12)-N(4)-Zn(1)-N(5)       | -163.7(14) |
| C(16)-N(4)-Zn(1)-N(5)       | 17.0(14)   |
| C(12)-N(4)-Zn(1)-O(1L)      | 115.2(13)  |
| C(16)-N(4)-Zn(1)-O(1L)      | -64.1(14)  |
| C(12)-N(4)-Zn(1)-O(2L)      | 105.5(15)  |
| C(16)-N(4)-Zn(1)-O(2L)      | -73.8(18)  |
| N(1L)-O(1L)-Zn(1)-N(1)      | 5(2)       |
| N(1L)-O(1L)-Zn(1)-N(2)      | -81.3(14)  |
| N(1L)-O(1L)-Zn(1)-N(5)      | 92.7(14)   |
| N(1L)-O(1L)-Zn(1)-N(4)      | -175.9(14) |
| N(1L)-O(1L)-Zn(1)-O(2L)     | -1.0(14)   |
| N(1L)-O(2L)-Zn(1)-N(1)      | -176.4(11) |
| N(1L)-O(2L)-Zn(1)-N(2)      | 94.8(11)   |
| N(1L)-O(2L)-Zn(1)-N(5)      | -79.5(11)  |
| N(1L)-O(2L)-Zn(1)-N(4)      | 12.3(17)   |
| N(1L)-O(2L)-Zn(1)-O(1L)     | 0.9(12)    |
| N(1B)-C(1B)-C(2B)-C(3B)     | 6(3)       |
| C(1B)-C(2B)-C(3B)-C(4B)     | 0(3)       |
| C(2B)-C(3B)-C(4B)-C(5B)     | -10(3)     |
| C(3B)-C(4B)-C(5B)-N(1B)     | 14(3)      |
| C(3B)-C(4B)-C(5B)-C(6B)     | -170.5(18) |
| N(1B)-C(5B)-C(6B)-C(7B)     | 2(3)       |
| C(4B)-C(5B)-C(6B)-C(7B)     | -172.9(17) |
| C(5B)-C(6B)-C(7B)-C(8B)     | -171.7(17) |
| C(5B)-C(6B)-C(7B)-N(2B)     | -5(3)      |
| C(6B)-C(7B)-C(8B)-O(1B)     | -10(3)     |
| N(2B)-C(7B)-C(8B)-O(1B)     | -179.1(17) |
| C(6B)-C(7B)-C(8B)-N(3B)     | 168.9(16)  |
| N(2B)-C(7B)-C(8B)-N(3B)     | 0(2)       |
| N(4B)-C(12B)-C(13B)-C(14B)  | -5(3)      |
| C(12B)-C(13B)-C(14B)-C(15B) | -4(4)      |
| C(13B)-C(14B)-C(15B)-C(16B) | 11(3)      |
| C(14B)-C(15B)-C(16B)-N(4B)  | -11(3)     |
| C(14B)-C(15B)-C(16B)-C(17B) | 178.2(16)  |

|                             |            |
|-----------------------------|------------|
| N(4B)-C(16B)-C(17B)-C(18B)  | -3(3)      |
| C(15B)-C(16B)-C(17B)-C(18B) | 168(2)     |
| C(16B)-C(17B)-C(18B)-N(5B)  | 10(4)      |
| C(16B)-C(17B)-C(18B)-C(19B) | -170.5(19) |
| C(17B)-C(18B)-C(19B)-O(2B)  | -9(4)      |
| N(5B)-C(18B)-C(19B)-O(2B)   | 171(2)     |
| C(17B)-C(18B)-C(19B)-N(6B)  | 171.0(19)  |
| N(5B)-C(18B)-C(19B)-N(6B)   | -9(2)      |
| C(6B)-C(5B)-N(1B)-C(1B)     | 177.5(16)  |
| C(4B)-C(5B)-N(1B)-C(1B)     | -7(2)      |
| C(6B)-C(5B)-N(1B)-Zn(1B)    | -14(2)     |
| C(4B)-C(5B)-N(1B)-Zn(1B)    | 161.8(12)  |
| C(2B)-C(1B)-N(1B)-C(5B)     | -2(3)      |
| C(2B)-C(1B)-N(1B)-Zn(1B)    | -171.7(17) |
| N(3B)-C(9B)-N(2B)-C(7B)     | 0(2)       |
| C(10B)-C(9B)-N(2B)-C(7B)    | -177.3(17) |
| N(3B)-C(9B)-N(2B)-Zn(1B)    | 172.1(12)  |
| C(10B)-C(9B)-N(2B)-Zn(1B)   | -6(3)      |
| C(6B)-C(7B)-N(2B)-C(9B)     | -167.9(18) |
| C(8B)-C(7B)-N(2B)-C(9B)     | 0(2)       |
| C(6B)-C(7B)-N(2B)-Zn(1B)    | 19(2)      |
| C(8B)-C(7B)-N(2B)-Zn(1B)    | -173.2(12) |
| O(1B)-C(8B)-N(3B)-C(11B)    | -4(3)      |
| C(7B)-C(8B)-N(3B)-C(11B)    | 176.9(18)  |
| O(1B)-C(8B)-N(3B)-C(9B)     | 179.5(16)  |
| C(7B)-C(8B)-N(3B)-C(9B)     | 0.2(19)    |
| N(2B)-C(9B)-N(3B)-C(11B)    | -177(2)    |
| C(10B)-C(9B)-N(3B)-C(11B)   | 1(3)       |
| N(2B)-C(9B)-N(3B)-C(8B)     | 0(2)       |
| C(10B)-C(9B)-N(3B)-C(8B)    | 177.6(15)  |
| C(13B)-C(12B)-N(4B)-C(16B)  | 5(3)       |
| C(13B)-C(12B)-N(4B)-Zn(1B)  | -164.3(15) |
| C(15B)-C(16B)-N(4B)-C(12B)  | 5(3)       |
| C(17B)-C(16B)-N(4B)-C(12B)  | 174.7(16)  |
| C(15B)-C(16B)-N(4B)-Zn(1B)  | 173.7(14)  |
| C(17B)-C(16B)-N(4B)-Zn(1B)  | -17(2)     |



|                             |            |
|-----------------------------|------------|
| C(17B)-C(18B)-N(5B)-C(20B)  | -175(2)    |
| C(19B)-C(18B)-N(5B)-C(20B)  | 5(2)       |
| C(17B)-C(18B)-N(5B)-Zn(1B)  | 7(3)       |
| C(19B)-C(18B)-N(5B)-Zn(1B)  | -172.5(13) |
| N(6B)-C(20B)-N(5B)-C(18B)   | 2(2)       |
| C(21B)-C(20B)-N(5B)-C(18B)  | 174.9(18)  |
| N(6B)-C(20B)-N(5B)-Zn(1B)   | 178.6(13)  |
| C(21B)-C(20B)-N(5B)-Zn(1B)  | -8(3)      |
| N(5B)-C(20B)-N(6B)-C(19B)   | -8(2)      |
| C(21B)-C(20B)-N(6B)-C(19B)  | 178.3(19)  |
| N(5B)-C(20B)-N(6B)-C(22B)   | 178.7(14)  |
| C(21B)-C(20B)-N(6B)-C(22B)  | 5(3)       |
| O(2B)-C(19B)-N(6B)-C(20B)   | -169(3)    |
| C(18B)-C(19B)-N(6B)-C(20B)  | 11(2)      |
| O(2B)-C(19B)-N(6B)-C(22B)   | 3(4)       |
| C(18B)-C(19B)-N(6B)-C(22B)  | -177.0(15) |
| O(2BL)-N(1BL)-O(1BL)-Zn(1B) | -8(2)      |
| O(3BL)-N(1BL)-O(1BL)-Zn(1B) | -143(3)    |
| O(1BL)-N(1BL)-O(2BL)-Zn(1B) | 7(2)       |
| O(3BL)-N(1BL)-O(2BL)-Zn(1B) | 156.6(13)  |
| C(18B)-N(5B)-Zn(1B)-N(2B)   | -117.7(13) |
| C(20B)-N(5B)-Zn(1B)-N(2B)   | 65.9(19)   |
| C(18B)-N(5B)-Zn(1B)-N(1B)   | 147.6(14)  |
| C(20B)-N(5B)-Zn(1B)-N(1B)   | -28.9(18)  |
| C(18B)-N(5B)-Zn(1B)-O(1BL)  | 61.3(15)   |
| C(20B)-N(5B)-Zn(1B)-O(1BL)  | -115.2(17) |
| C(18B)-N(5B)-Zn(1B)-N(4B)   | -18.7(15)  |
| C(20B)-N(5B)-Zn(1B)-N(4B)   | 164.8(17)  |
| C(18B)-N(5B)-Zn(1B)-O(2BL)  | 54(2)      |
| C(20B)-N(5B)-Zn(1B)-O(2BL)  | -122.4(17) |
| C(9B)-N(2B)-Zn(1B)-N(5B)    | 65(2)      |
| C(7B)-N(2B)-Zn(1B)-N(5B)    | -124.2(12) |
| C(9B)-N(2B)-Zn(1B)-N(1B)    | 168.4(18)  |
| C(7B)-N(2B)-Zn(1B)-N(1B)    | -20.9(13)  |
| C(9B)-N(2B)-Zn(1B)-O(1BL)   | -112.4(19) |
| C(7B)-N(2B)-Zn(1B)-O(1BL)   | 58(2)      |

|                             |            |
|-----------------------------|------------|
| C(9B)-N(2B)-Zn(1B)-N(4B)    | -29.5(18)  |
| C(7B)-N(2B)-Zn(1B)-N(4B)    | 141.1(13)  |
| C(9B)-N(2B)-Zn(1B)-O(2BL)   | -110.7(18) |
| C(7B)-N(2B)-Zn(1B)-O(2BL)   | 59.9(13)   |
| C(5B)-N(1B)-Zn(1B)-N(5B)    | 133.5(14)  |
| C(1B)-N(1B)-Zn(1B)-N(5B)    | -57.8(14)  |
| C(5B)-N(1B)-Zn(1B)-N(2B)    | 20.8(14)   |
| C(1B)-N(1B)-Zn(1B)-N(2B)    | -170.4(14) |
| C(5B)-N(1B)-Zn(1B)-O(1BL)   | -133.0(15) |
| C(1B)-N(1B)-Zn(1B)-O(1BL)   | 35.8(13)   |
| C(5B)-N(1B)-Zn(1B)-N(4B)    | -92(2)     |
| C(1B)-N(1B)-Zn(1B)-N(4B)    | 77(3)      |
| C(5B)-N(1B)-Zn(1B)-O(2BL)   | -76.5(14)  |
| C(1B)-N(1B)-Zn(1B)-O(2BL)   | 92.2(14)   |
| N(1BL)-O(1BL)-Zn(1B)-N(5B)  | -171.2(14) |
| N(1BL)-O(1BL)-Zn(1B)-N(2B)  | 7(2)       |
| N(1BL)-O(1BL)-Zn(1B)-N(1B)  | 86.7(14)   |
| N(1BL)-O(1BL)-Zn(1B)-N(4B)  | -80.6(14)  |
| N(1BL)-O(1BL)-Zn(1B)-O(2BL) | 4.6(14)    |
| C(12B)-N(4B)-Zn(1B)-N(5B)   | -167.9(15) |
| C(16B)-N(4B)-Zn(1B)-N(5B)   | 23.4(14)   |
| C(12B)-N(4B)-Zn(1B)-N(2B)   | -55.3(15)  |
| C(16B)-N(4B)-Zn(1B)-N(2B)   | 136.0(14)  |
| C(12B)-N(4B)-Zn(1B)-N(1B)   | 56(3)      |
| C(16B)-N(4B)-Zn(1B)-N(1B)   | -112(2)    |
| C(12B)-N(4B)-Zn(1B)-O(1BL)  | 97.8(15)   |
| C(16B)-N(4B)-Zn(1B)-O(1BL)  | -70.8(14)  |
| C(12B)-N(4B)-Zn(1B)-O(2BL)  | 40.7(14)   |
| C(16B)-N(4B)-Zn(1B)-O(2BL)  | -127.9(14) |
| N(1BL)-O(2BL)-Zn(1B)-N(5B)  | 4.3(18)    |
| N(1BL)-O(2BL)-Zn(1B)-N(2B)  | 176.6(12)  |
| N(1BL)-O(2BL)-Zn(1B)-N(1B)  | -94.9(12)  |
| N(1BL)-O(2BL)-Zn(1B)-O(1BL) | -4.3(13)   |
| N(1BL)-O(2BL)-Zn(1B)-N(4B)  | 79.9(12)   |

---

Symmetry transformations used to generate equivalent atoms:

## References and Notes

---

- 1 The 1,2-dimethyl-1*H*-imidazol-5(4*H*)-one was synthesized according to Wu, L.; Burgess, K. *J. Am. Chem. Soc.* **2008**, *130*, 4089-4096.
- 2 Mehnert, C.P.; Dispenziere, N.C.; Cook, R.A. *Chem. Commun.* **2002**, 1610-1611.
- 3 Ranu, B.C.; Banerjee, S. *Org. Lett.* **2005**, *7*, 3049-3052
- 4 Ranu, B.C.; Jana, R. *Eur. J. Org. Chem.* **2006**, 3767-3770.
- 5 Wu, L.; Burgess, K. *J. Am. Chem. Soc.* **2008**, *130*, 4089-4096.
- 6 Ranu, B.C.; Banerjee, S. *Org. Lett.* **2005**, *7*, 3049-3052
- 7 Note: The <sup>1</sup>H NMR spectra of (*Z*)-1,2-dimethyl-4-(pyridin-2-ylmethylene)-1*H*-imidazol-5(4*H*)-one and of its Zn(II) complex were not of the first order and the coupling constants were not optimized but were identified by visual inspection.
- 8 MacCarthy, P. *Anal. Chem.* **1978**, *50*, 2165-2166.
- 9 Galan, M.; Carmona, C.; Guardado, P.; Munoz, M.A.; Balon, M. *J. Photochem. Photobiol. A* **2002**, *147*, 103-108.
- 10 Carlson, G.A.; McReynolds, J.P.; Verhoek, T.H., *J. Am. Chem. Soc.* **1945**, *67*, 1334.
- 11 Kolthoff, I.M.; Leusing, D.L.; Lee, T.S., *J. Am. Chem. Soc.* **1951**, *73*, 390.
- 12 Izatt, R.M.; Fernelius W.C.; Block. B.P., *J. Phys. Chem.* **1955**, *59*, 235.
